# Supplementary material for: Picolinamide-functionalized macrocyclic chelators for 203/212Pb theranostic radiotracers
Source: Royal Society of Chemistry journal article supplement (doi:10.1039/d6qi01035k), 2026-06-11
Supplement: d6qi01035k1.pdf [file d6qi01035k1.pdf]

## Supplementary Information

### **Picolinamide-functionalized macrocyclic chelators for $^{203/212}\text{Pb}$ theranostic radiotracers**

Bradley E. Osborne,<sup>\*a,b</sup> Christina Siakalli,<sup>a,b</sup> Ryan K. Brown,<sup>a</sup> Andrew J. P. White,<sup>a</sup> Claudio Rocco,<sup>c</sup> Dominik Weiss,<sup>c</sup> Estefanía Delgado-Pinar,<sup>d</sup> Enrique García-España,<sup>d</sup> Jane K. Sosabowski,<sup>e</sup> Michelle T. Ma,<sup>b</sup> and Nicholas J. Long<sup>\*a</sup>

- a. Department of Chemistry, Imperial College London, Molecular Sciences Research Hub, White City Campus, London, W12 0BZ, UK. E-mail: [n.long@imperial.ac.uk](mailto:n.long@imperial.ac.uk) and [b.osborne18@imperial.ac.uk](mailto:b.osborne18@imperial.ac.uk)
- b. School of Biomedical Engineering and Imaging Sciences, King's College London, 4th Floor Lambeth Wing, St Thomas' Hospital, London, SE1 7EH, UK.
- c. Department of Earth Science and Engineering, Imperial College London, South Kensington Campus, London, SW7 2BP, UK.
- d. Institute of Molecular Sciences, Universitat de València, València, Spain.
- e. Centre for Cancer Biomarkers and Biotherapeutics, Barts Cancer Institute, Queen Mary University of London, London, UK.

### **Contents**

|                                                                                                           |    |
|-----------------------------------------------------------------------------------------------------------|----|
| 1. General considerations .....                                                                           | 2  |
| 2. Chelator Synthesis.....                                                                                | 2  |
| 3. $\text{Pb}^{2+}$ Complex Formation .....                                                               | 4  |
| 4. Radiochemistry .....                                                                                   | 5  |
| 5. Radio-TLC Chromatograms .....                                                                          | 6  |
| 6. NMR Spectroscopy .....                                                                                 | 8  |
| 7. Mass Spectra .....                                                                                     | 16 |
| 8. HPLC Spectra .....                                                                                     | 19 |
| 9. Potentiometric Titration and UV-Vis Spectroscopy Measurements .....                                    | 23 |
| 10. Crystal Data and Structure Refinement Details for $[\text{Pb}(\text{K22\_PicAm})]-2\text{PF}_6$ ..... | 30 |
| 11. Density Functional Theory (DFT) Calculations .....                                                    | 35 |
| 12. References.....                                                                                       | 48 |

## 1. General considerations

**Reagents:** All solvents were purchased from commercial suppliers (Sigma-Aldrich, Fischer Scientific, TCI America, Fluorochem Ltd) and were used without further purification. All gas mixtures were purchased from BOC Industrial Gases. Anhydrous solvents were acquired from a Grubbs type SPS system and stored over activated 3 Å molecular sieves under inert atmosphere.

**Instruments and characterisation:**  $^1\text{H}$ ,  $^{13}\text{C}$  and  $^{207}\text{Pb}$  NMR spectra and 2D experiments (e.g., COSY, HSQC) were obtained using Bruker AV-400, AV-500, and DR-400 spectrometers. Chemical shifts ( $\delta$ ) are reported in ppm relative to residual undeuterated solvent signals ( $\text{CDCl}_3$   $\delta_{\text{H}} = 7.26$  ppm,  $\delta_{\text{C}} = 77.16$  ppm;  $\text{D}_2\text{O}$   $\delta_{\text{H}} = 4.79$  ppm;  $\text{CD}_3\text{OD}$   $\delta_{\text{H}} = 3.31$  ppm,  $\delta_{\text{C}} = 49.00$  ppm). The following abbreviations are used to designate multiplicities: s = single, d = doublet, t = triplet, q = quartet, m = multiplet, quint = quintet, br = broad. Coupling constants ( $J$ ) are reported in hertz (Hz). NMR spectra were analysed using MESTRELAB MestReNova software. High resolution mass spectra were recorded using a Waters LCT Premier (ESI) spectrometer by the Imperial College Department of Chemistry Mass Spectrometry service, or independently on an Agilent 6200 TOF LC-MS instrument. Reverse-phase purifications were carried out on an Isolera™ 4 System using Biotage® Sfär Ultra C18 cartridges (12 g), and gradients are indicated throughout the text. Thin Layer Chromatography (TLC) was performed using TLC silica gel 60 F254 (aluminium sheets 20 × 20 cm).

Analytical HPLC chromatograms were obtained using an Agilent 1200 series instrument equipped with a flow-ram detector (Lablogic, Sheffield, UK), and integrated using Laura 6 software (Lablogic, Sheffield, UK). Columns, flow rate, and mobile phases are indicated in the text.

## 2. Chelator Synthesis

6,6'-((1,4,10,13-tetraoxa-7,16-diazacyclooctadecane-7,16-diyl)bis(methylene))dipicolinate (**1**) and 18-nitro-3,4,5,6,8,9,12,13,14,15-decahydro-2H,11H-benzo[*b*][1,4,10,13]tetraoxa[7,16]diazacyclooctadecine (**2**) were prepared according to previously reported procedures.<sup>1,2</sup>

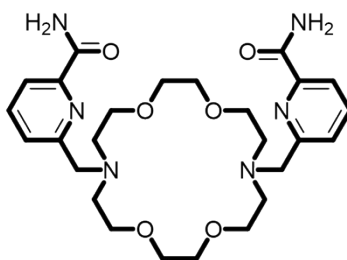

**6,6'-((1,4,10,13-tetraoxa-7,16-diazacyclooctadecane-7,16-diyl)bis(methylene)) dipicolinamide<sup>3</sup> (K22\_PicAm):**

6,6'-((1,4,10,13-tetraoxa-7,16-diazacyclooctadecane-7,16-diyl)bis(methylene))dipicolinate (**1**) was added to an ice-cold solution of concentrated  $\text{NH}_3(\text{aq})$  (35 % wt., 25 mL) at 0 °C. The mixture was left to stir at room temperature overnight. The product was extracted from the aqueous layer with DCM (5 × 50 mL), the organic layers were combined, dried over  $\text{MgSO}_4$ , filtered, and concentrated under vacuum. The resulting crude residue was purified by reverse-phase chromatography (C18, 0-100 % MeCN + 0.3 %  $\text{NH}_3(\text{aq})$  in  $\text{H}_2\text{O}$  + 0.3 %  $\text{NH}_3(\text{aq})$ ) to give the product as an off-white solid (0.10 g, 0.19 mmol, 21 %).  $^1\text{H}$  NMR (400 MHz,  $\text{CD}_3\text{OD}$ )  $\delta_{\text{H}}$  (ppm): 7.94 (4H, m, Py-CH), 7.65 (2H, dd,  $^3J_{\text{HH}} = 7.4$ ,  $^4J_{\text{HH}} = 1.5$  Hz, Py-CH), 3.98 (4H, s,  $\text{CH}_2\text{Py}$ ), 3.68 (8H, t,  $^3J_{\text{HH}} = 5.3$  Hz, macro-H), 3.58 (8H, s, macro-H), 2.90 (8H, t,  $^3J_{\text{HH}} = 5.2$  Hz, macro-H).  $^{13}\text{C}\{^1\text{H}\}$  NMR (101 MHz,  $\text{CD}_3\text{OD}$ )  $\delta_{\text{C}}$  (ppm): 169.3, 159.5, 150.5, 139.2, 127.7, 121.8, 71.5, 69.9, 60.8, 55.5. HRMS (ES-TOF+):  $m/z$  calcd. for  $\text{C}_{26}\text{H}_{39}\text{N}_6\text{O}_6$  ( $[\text{M}+\text{H}]^+$ ) 531.2931. found: 531.2938.

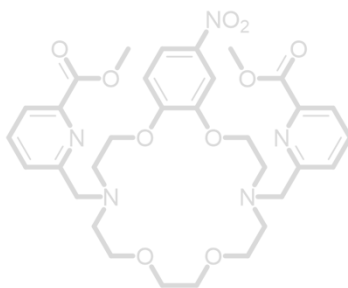

**Dimethyl 6,6'-((18-nitro-2,3,5,6,8,9,11,12,14,15-decahydro-4H,13H-benzo[b][1,4,10,13]tetraoxa[7,16]diazacyclooctadecine-4,13-diyl)bis(methylene))dipicolinate (3):** 18-nitro-3,4,5,6,8,9,12,13,14,15-decahydro-2H,11H-benzo[b][1,4,10,13]tetraoxa[7,16]diazacyclooctadecine (2) (0.75 g, 2.11 mmol), 6-chloromethylpyridine-2-carboxylic acid methyl ester (0.82 g, 4.43 mmol) and Na<sub>2</sub>CO<sub>3</sub> (0.89 g, 8.44 mmol) were added to dry MeCN (30 mL) under N<sub>2</sub>. The reaction mixture was stirred at 80 °C under N<sub>2</sub> for 3 days. The mixture was then cooled to room temperature, filtered and the solvent was removed under vacuum. The resulting crude residue was purified by flash silica column chromatography (SiO<sub>2</sub>, DCM:MeOH, 85:15) to give the pure product as an orange oil (0.22 g, 0.34 mmol, 16 %). <sup>1</sup>H NMR (400 MHz, CDCl<sub>3</sub>) δ<sub>H</sub> (ppm): 7.90 (2H, m, Py-CH), 7.78 (3H, m, Py-CH/Ar-CH), 7.69 (2H, d, *J* = 7.8 Hz, Py-CH), 7.56 (1H, d, *J* = 2.7 Hz, Ar-CH), 6.77 (2H, d, *J* = 8.9 Hz, Ar-CH), 4.22 (4H, dt, *J* = 13.8, 5.3 Hz, macro-*H*), 4.02 (4H, s, CH<sub>2</sub>Py), 3.95 (6H, d, *J* = 1.9 Hz, PyCOOCH<sub>3</sub>), 3.70 (4H, dt, *J* = 6.6, 3.3 Hz, macro-*H*), 3.58 (4H, s, macro-*H*), 3.18 (4H, q, *J* = 5.3 Hz, macro-*H*), 2.97 (4H, q, *J* = 5.3 Hz, macro-*H*). <sup>13</sup>C{<sup>1</sup>H} NMR (101 MHz, CDCl<sub>3</sub>) δ<sub>C</sub> (ppm): 165.9, 160.0, 153.5, 147.7, 147.1, 146.9, 141.3, 137.9, 126.8, 126.7, 123.8, 123.8, 118.0, 110.9, 107.4, 70.2, 68.9, 60.2, 54.7, 54.5, 53.1. HRMS (ES-TOF<sup>+</sup>): *m/z* calcd. for C<sub>32</sub>H<sub>40</sub>N<sub>5</sub>O<sub>10</sub> ([M+H]<sup>+</sup>) 654.2775. found: 654.2786.

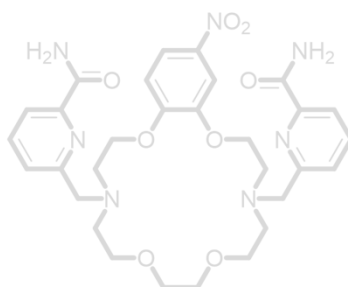

**6,6'-((18-nitro-2,3,5,6,8,9,11,12,14,15-decahydro-4H,13H-benzo[b][1,4,10,13]tetraoxa[7,16]diazacyclooctadecine-4,13-diyl)bis(methylene))dipicolinamide (NPK\_PicAm):** Dimethyl 6,6'-((18-nitro-2,3,5,6,8,9,11,12,14,15-decahydro-4H,13H-benzo[b][1,4,10,13]tetraoxa[7,16]diazacyclooctadecine-4,13-diyl)bis(methylene))dipicolinate (3) (0.86 g, 1.32 mmol) was added to NH<sub>3(aq)</sub> (35 mL) and stirred at room temperature for 5 days. The mixture was concentrated under vacuum and the crude residue was purified by reverse-phase column chromatography (C18, 0-100 % MeCN + 0.3 % NH<sub>3(aq)</sub> in H<sub>2</sub>O + 0.3 % NH<sub>3(aq)</sub>) to give the product as a yellow solid (0.31 g, 0.50 mmol, 38 %). <sup>1</sup>H NMR (400 MHz, CD<sub>3</sub>OD) δ<sub>H</sub> (ppm): 7.93 (2H, dt, *J* = 7.7, 1.6 Hz, Py-CH), 7.84 (3H, m, Py-CH/Ar-CH), 7.72 (2H, dt, *J* = 7.7, 1.6 Hz, Py-CH), 7.68 (1H, d, *J* = 2.7 Hz, Ar-CH), 6.97 (1H, d, *J* = 9.0 Hz, Ar-CH), 4.23 (4H, dt, *J* = 10.5, 5.5 Hz, macro-*H*), 4.03 (4H, d, *J* = 3.2 Hz, Py-CH<sub>2</sub>), 3.73 (4H, t, *J* = 5.6 Hz, macro-*H*), 3.60 (4H, s, macro-*H*), 3.35 (4H, s, macro-*H*), 3.22 (4H, t, *J* = 5.5 Hz, macro-*H*), 3.04 (4H, dt, *J* = 5.9, 2.9 Hz, macro-*H*). <sup>13</sup>C{<sup>1</sup>H} NMR (101 MHz, CD<sub>3</sub>OD) δ<sub>C</sub> (ppm): 169.4, 160.3, 155.5, 150.4, 149.6, 142.5, 139.1, 127.5, 121.7, 118.7, 112.2, 108.5, 71.6, 70.5, 68.9, 68.8, 61.4, 55.7, 55.7, 54.4, 54.3. HRMS (ES-TOF<sup>+</sup>): *m/z* calcd. for C<sub>30</sub>H<sub>38</sub>N<sub>7</sub>O<sub>8</sub> ([M+H]<sup>+</sup>) 624.2782. found: 624.2785.

### 3. Pb<sup>2+</sup> Complex Formation

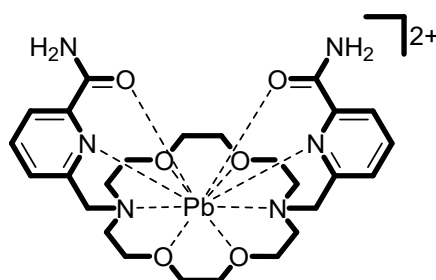

**[Pb(K22\_PicAm)][HCOOH]<sub>2</sub>:** K22\_PicAm (0.03 g, 0.06 mmol) was dissolved in 20 mM NH<sub>4</sub>OAc (pH 4.5, 5 mL). Pb(OAc)<sub>2</sub>·3H<sub>2</sub>O (0.027 g, 0.07 mmol) was added to the solution and stirred at room temperature for 15 minutes. The reaction mixture purified by reverse-phase chromatography (0-100 % MeCN + 0.1 % FA in H<sub>2</sub>O + 0.1 % FA) to give the product as a yellow oil (0.03 g, 0.04 mmol, 60 %). <sup>1</sup>H NMR (400 MHz, CD<sub>3</sub>OD) δ<sub>H</sub> (ppm): 8.06 (2H, t, *J* = 7.8 Hz, Py-*CH*), 7.76 (4H, dd, *J* = 7.8, 5.2 Hz, Py-*CH*), 5.14 (2H, d, *J* = 15.8 Hz, CH<sub>2</sub>Py), 4.45 (2H, t, *J* = 11.0 Hz, macro-*H*), 3.98 (2H, t, *J* = 11.0 Hz, macro-*H*), 3.81 (6H, m, CH<sub>2</sub>Py/macro-*H*), 3.62 (4H, dd, *J* = 13.2, 9.9 Hz, macro-*H*), 3.52 (2H, d, *J* = 9.5 Hz, macro-*H*), 3.41 (4H, dd, *J* = 21.4, 7.6 Hz, macro-*H*), 2.59 (4H, m, macro-*H*), 2.41 (2H, d, *J* = 13.8 Hz, macro-*H*). <sup>13</sup>C{<sup>1</sup>H} NMR (101 MHz, CD<sub>3</sub>OD) δ<sub>C</sub> (ppm): 170.4, 167.5, 162.2, 148.5, 141.1, 129.3, 123.0, 71.7, 70.9, 69.6, 68.2, 60.7, 56.7, 55.2. <sup>207</sup>Pb{<sup>1</sup>H} NMR (84 MHz, D<sub>2</sub>O) δ<sub>Pb</sub> (ppm): -2289. HRMS (ES-TOF<sup>+</sup>): *m/z* calcd. for C<sub>26</sub>H<sub>37</sub>N<sub>6</sub>O<sub>6</sub>Pb ([M-HCOOH]<sup>+</sup>) 737.2541. found: 737.2521. ([M-2(HCOOH)]<sup>2+</sup>) found: 369.1251.

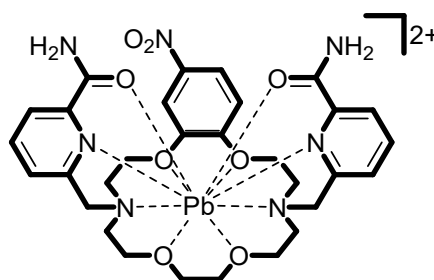

**[Pb(NPK\_PicAm)][HCOOH]<sub>2</sub>:** NPK\_PicAm (0.05 g, 0.08 mmol) was dissolved in CD<sub>3</sub>OD (10 mL). Pb(OAc)<sub>2</sub>·3H<sub>2</sub>O (0.03 g, 0.08 mmol) was added to the solution and stirred at room temperature for a total of 2 hours (aliquots taken for <sup>1</sup>H NMR and HPLC analysis at *t* = 0, 0.5, 1 and 2 hours, **Fig. S20** and **Fig. S30**). The mixture was then heated at 70 °C for a total of 128 hours (aliquots taken for <sup>1</sup>H NMR and HPLC analysis at *t* = 0.5, 1, 2, 24, 40 and 128 hours, **Fig. S20** and **Fig. S30**). HRMS (ES-TOF<sup>+</sup>): *m/z* calcd. for C<sub>30</sub>H<sub>36</sub>N<sub>7</sub>O<sub>8</sub>Pb ([M-HCOOH]<sup>+</sup>) 830.2386. found: 830.2378. ([M-2(HCOOH)]<sup>2+</sup>) calcd. 415.6231. found: 415.6230.

### 4. Radiochemistry

#### Radiolabelling procedures:

**Caution:** <sup>212</sup>Pb emits ionizing radiation and should only be used in a facility in accordance with appropriate safety controls.

Radiolabelling experiments were conducted for K22\_PicAm and NPK\_PicAm with [<sup>212</sup>Pb]Pb(OAc)<sub>2</sub>. For K22\_PicAm, the radiolabelling reactions were followed at two temperatures (37 °C and 95 °C) and a single time point of 15 minutes. For NPK\_PicAm, the radiolabelling reactions were performed at 95 °C for 15 minutes. Stock solutions, with a concentration of 0.02

M of **K22\_PicAm** and **NPK\_PicAm** were prepared in NaOAc (0.5 M, pH 5). Concentration-dependent experiments with both **K22\_PicAm** and **NPK\_PicAm** were conducted by serial dilution of stock solutions to prepare chelator solutions with concentrations between  $10^{-3}$  and  $5 \times 10^{-6}$  M (**1 mM, 100  $\mu$ M, 50  $\mu$ M, 10  $\mu$ M and 5  $\mu$ M**). For  $[^{212}\text{Pb}]\text{Pb}^{2+}$  labelling experiments, a 5  $\mu$ L aliquot of chelator (or 0.5 M NaOAc for the negative control) was added to 100  $\mu$ L of  $[^{212}\text{Pb}]\text{Pb}(\text{OAc})_2$  (1 MBq, 0.5 M NaOAc, pH 5.5) and mixed to begin the reactions, which were left at either 37  $^{\circ}\text{C}$  or 95  $^{\circ}\text{C}$  for 15 minutes. iTLC was used to determine radiochemical conversion (RCC) of the reactions using iTLC-SG (iTLC paper impregnated with a silica gel) plates. The mobile phase used was a 0.1 M solution of  $\text{NH}_4\text{OAc}$  with 25 mM EDTA (pH 5.7). Using this iTLC system,  $[^{212}\text{Pb}]\text{Pb}^{2+}$  labelled complex remained at the baseline ( $R_f = 0$ ), while ‘free’  $[^{212}\text{Pb}]\text{Pb}^{2+}$  migrated at the solvent front ( $R_f = 1$ ), shown below, Fig. S1-S3. Aliquots of the reactions were taken at 15 minutes, spotted onto the plates, and developed. RCCs were measured using a Perkin Elmer Cyclone phosphor imager. Radiochemical conversions (RCCs) were determined once the resulting iTLC-SG plates were left to decay for 18-24 hours to allow for the decay of daughter radionuclides ( $^{212}\text{Bi}$  and  $^{208}\text{Tl}$ ) before measurements were taken.

## 5. Radio-TLC Chromatograms

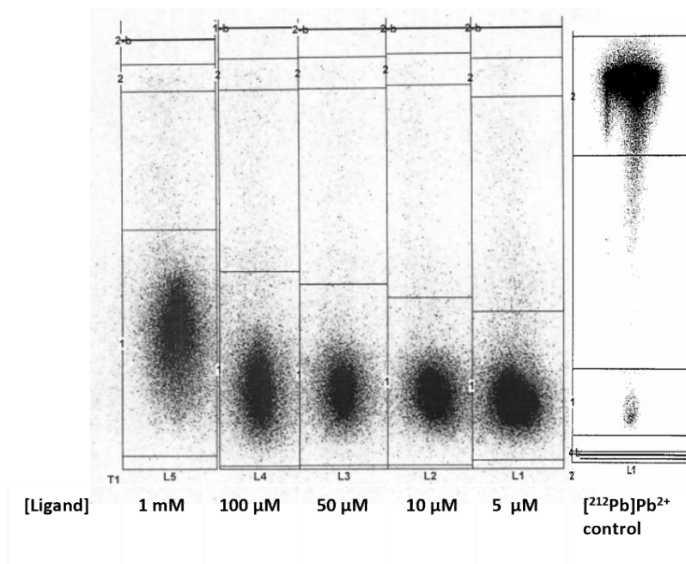

**Figure S1.** iTLC plates of  $[^{212}\text{Pb}]\text{Pb}^{2+}$  labelling of **K22\_PicAm** with 0.1 M  $\text{NH}_4\text{OAc}$  (pH 5.7) and 25 mM EDTA mobile phase. Reaction conditions: 95  $^{\circ}\text{C}$ , 15 minutes. A  $[^{212}\text{Pb}]\text{Pb}^{2+}$  control was also performed using the same conditions, shown on the right.

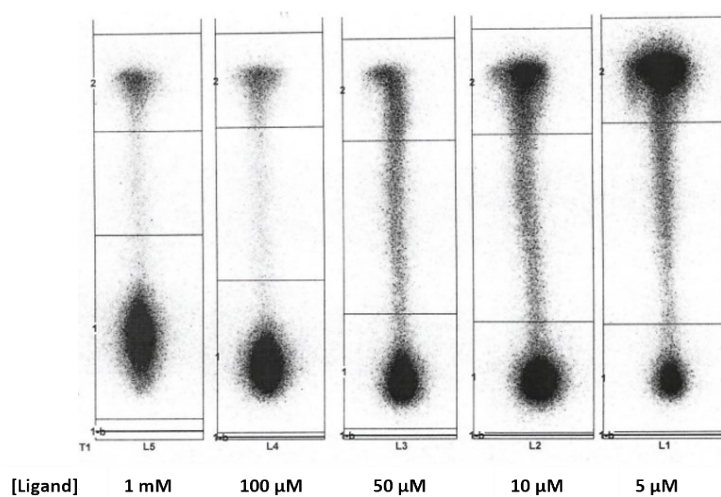

**Figure S2.** iTLC plates of  $[^{212}\text{Pb}]\text{Pb}^{2+}$  labelling of **K22\_PicAm** with 0.1 M  $\text{NH}_4\text{OAc}$  (pH 5.7) and 25 mM EDTA mobile phase. Reaction conditions: 37 °C, 15 minutes.

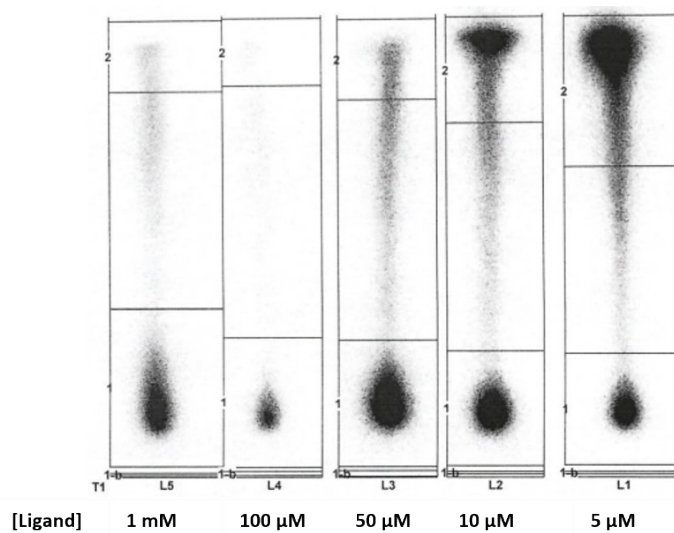

**Figure S3.** iTLC plates of  $[^{212}\text{Pb}]\text{Pb}^{2+}$  labelling of **NPK\_PicAm** with 0.1 M  $\text{NH}_4\text{OAc}$  (pH 5.7) and 25 mM EDTA mobile phase. Reaction conditions: 95 °C, 15 minutes.

**Table S1.** The RCC values for  $[^{212}\text{Pb}]\text{Pb}^{2+}$  with **K22\_PicAm** and **NPK\_PicAm** at different ligand concentrations (1000  $\mu\text{M}$  to 5  $\mu\text{M}$ ) in 0.5 M  $\text{NaOAc}$  (pH 5.5) over 15 min at 37 °C and 95 °C.

| Chelator  | Concentration ( $\mu\text{M}$ ) | Temperature ( $^{\circ}\text{C}$ ) | RCC (%) |
|-----------|---------------------------------|------------------------------------|---------|
| K22_PicAm | 1000                            | 95                                 | 99      |
|           |                                 | 37                                 | 85      |
|           | 100                             | 95                                 | 99      |
|           |                                 | 37                                 | 88      |
|           | 50                              | 95                                 | 99      |
|           |                                 | 37                                 | 74      |

|                  |      |    |    |
|------------------|------|----|----|
|                  | 10   | 95 | 99 |
|                  |      | 37 | 66 |
|                  | 5    | 95 | 99 |
|                  |      | 37 | 25 |
| <b>NPK_PicAm</b> | 1000 | 95 | 89 |
|                  |      | 37 | -  |
|                  | 100  | 95 | 91 |
|                  |      | 37 | -  |
|                  | 50   | 95 | 85 |
|                  |      | 37 | -  |
|                  | 10   | 95 | 53 |
|                  |      | 37 | -  |
|                  | 5    | 95 | 23 |
|                  |      | 37 | -  |

## 6. NMR Spectroscopy

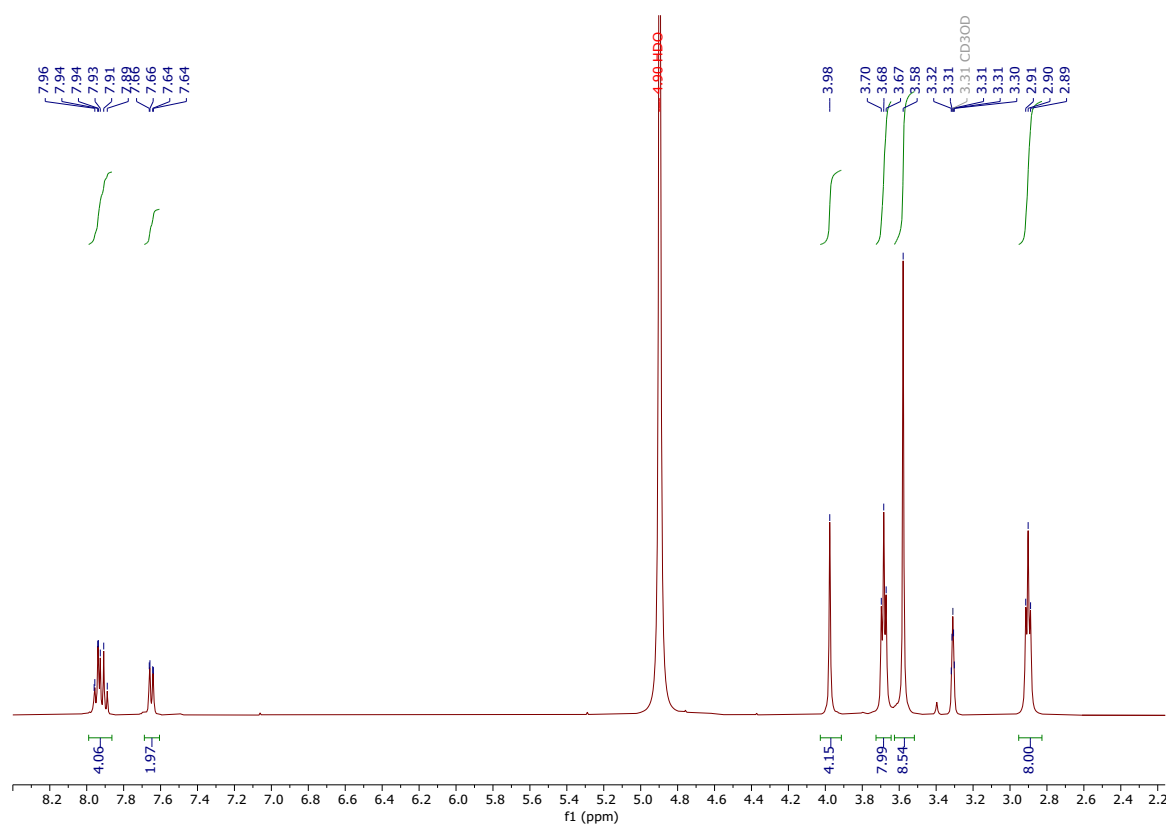

**Figure S4.** <sup>1</sup>H NMR spectrum of K22\_PicAm (400 MHz, CD<sub>3</sub>OD, 298 K).

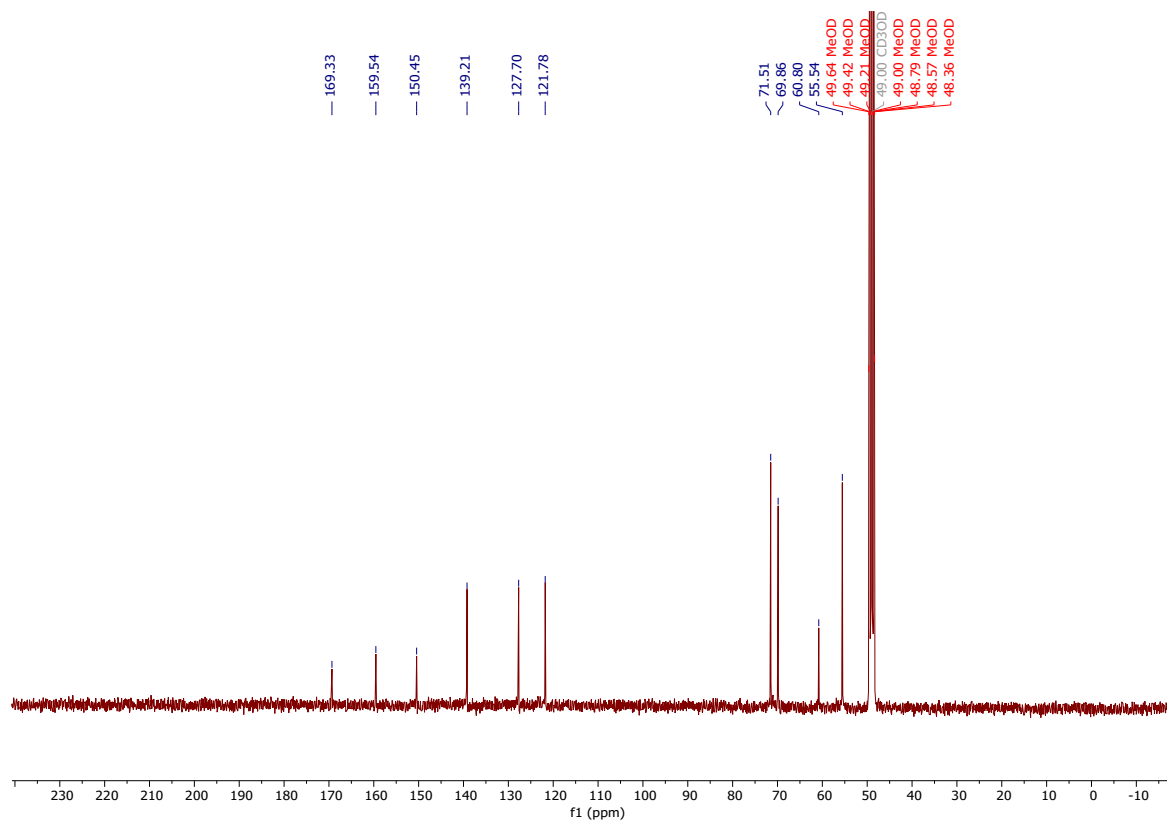

Figure S5.  $^{13}\text{C}\{^1\text{H}\}$  NMR spectrum of K22\_PicAm (101 MHz,  $\text{CD}_3\text{OD}$ , 298 K).

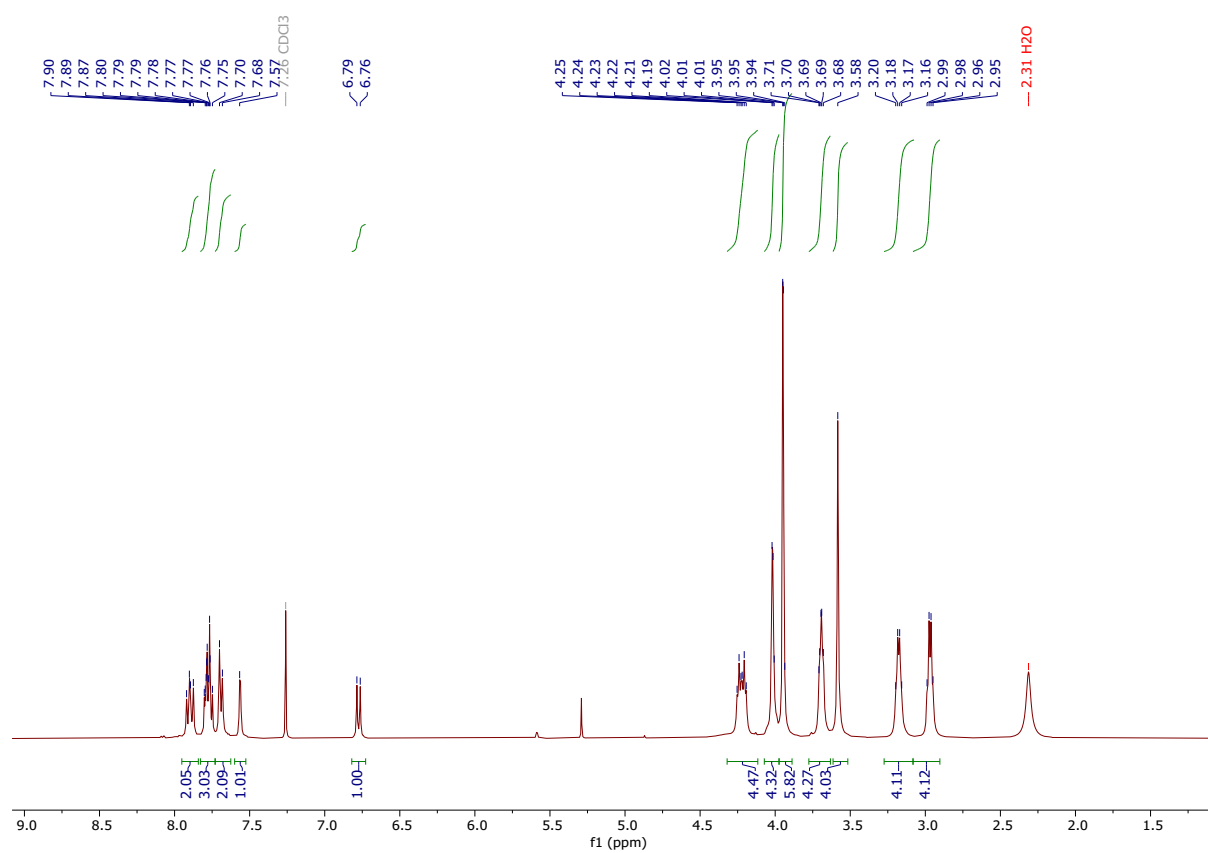

Figure S6.  $^1\text{H}$  NMR spectrum of compound 3 (400 MHz,  $\text{CDCl}_3$ , 298 K).

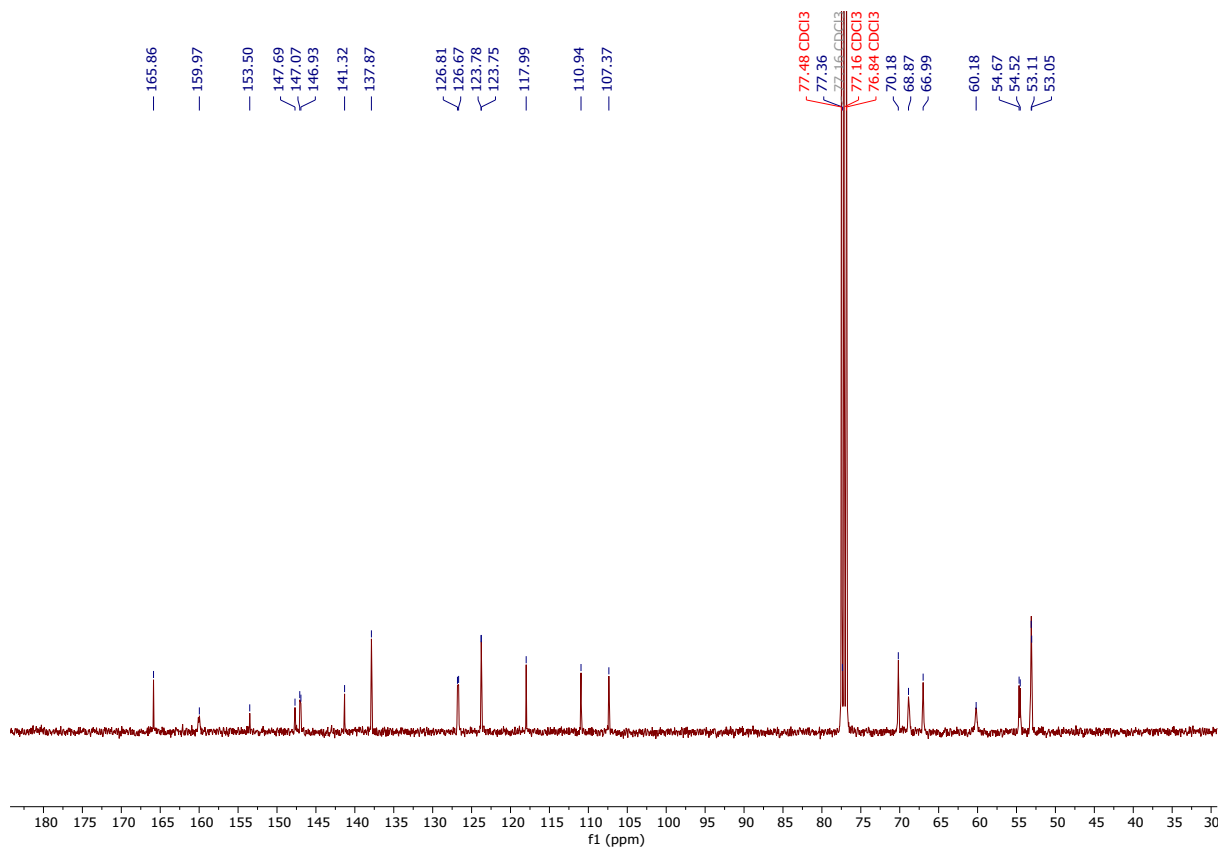

**Figure S7.**  $^{13}\text{C}\{^1\text{H}\}$  NMR spectrum of compound **3** (101 MHz,  $\text{CDCl}_3$ , 298 K).

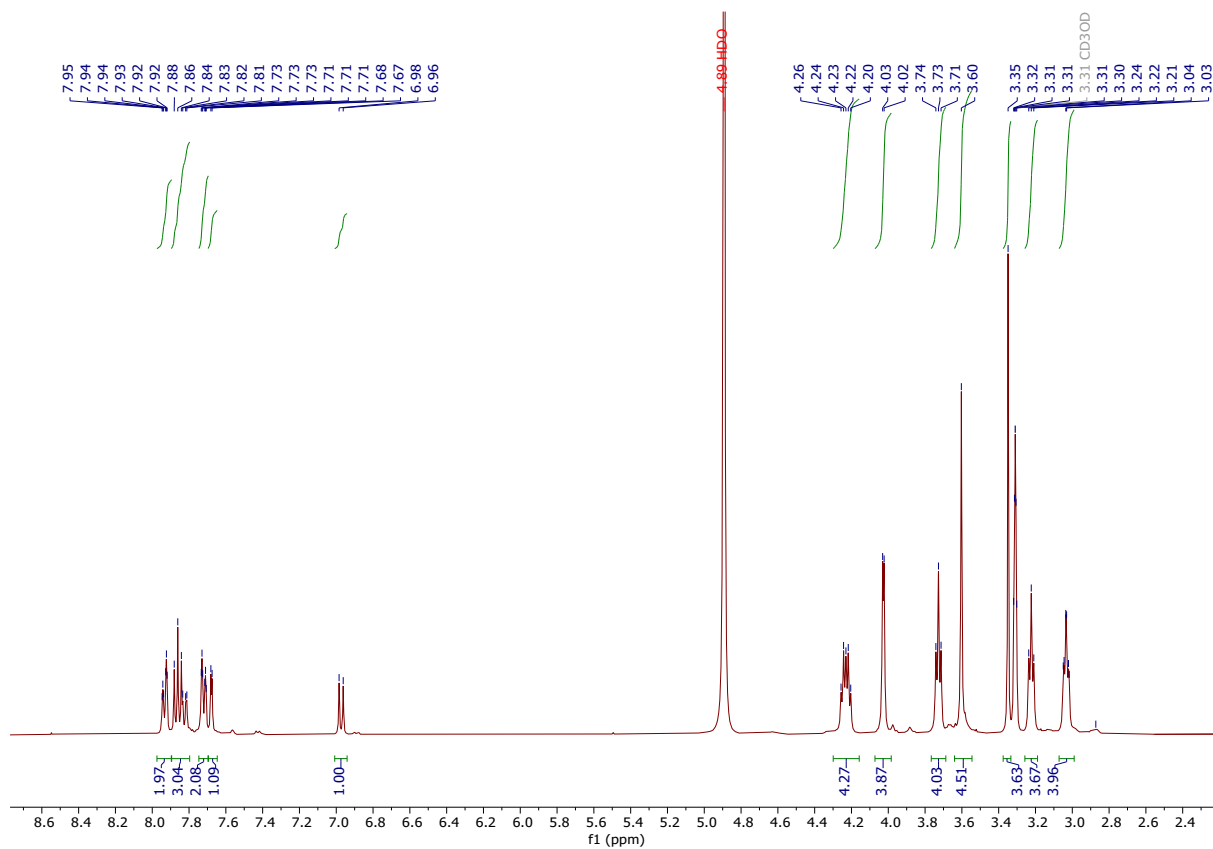

**Figure S8.**  $^1\text{H}$  NMR spectrum of NPK\_PicAm (400 MHz,  $\text{CD}_3\text{OD}$ , 298 K).

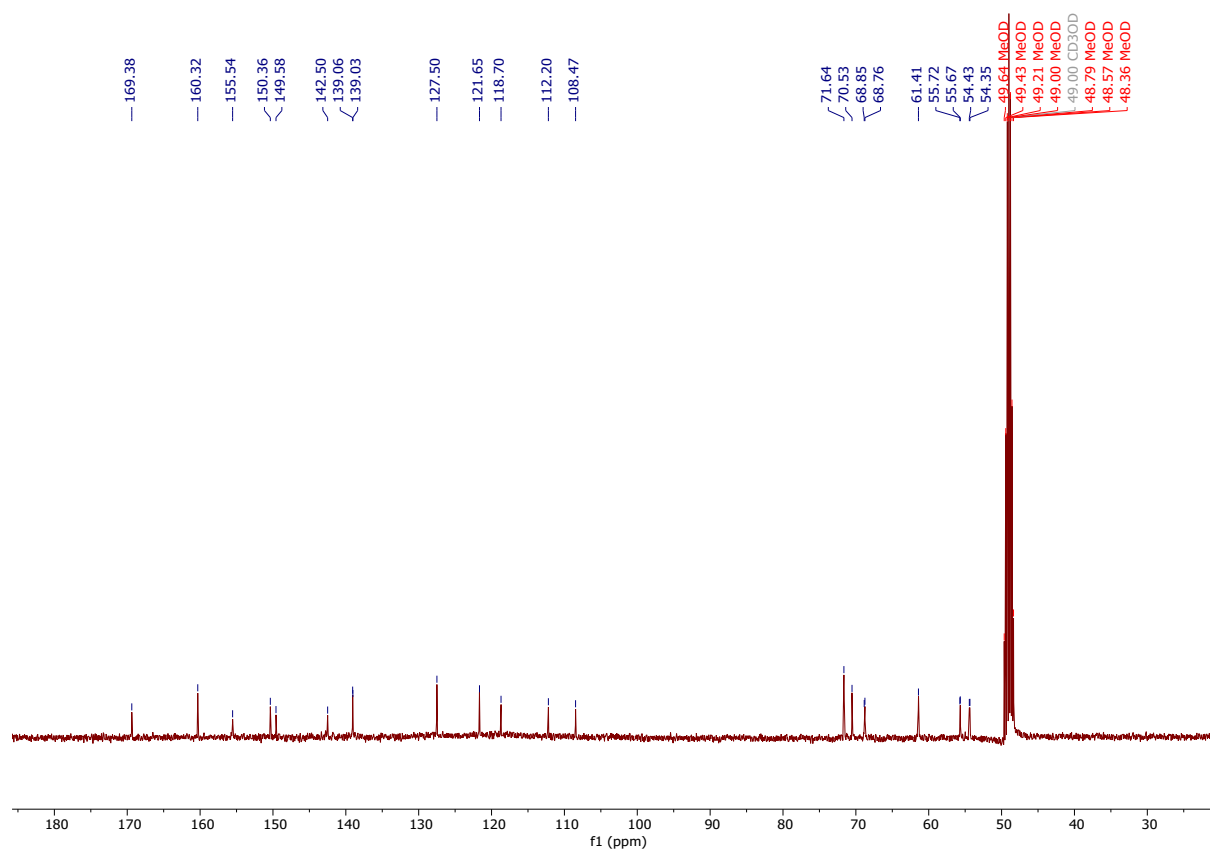

**Figure S9.**  $^{13}\text{C}\{^1\text{H}\}$  NMR spectrum of NPK\_PicAm (101 MHz,  $\text{CD}_3\text{OD}$ , 298 K).

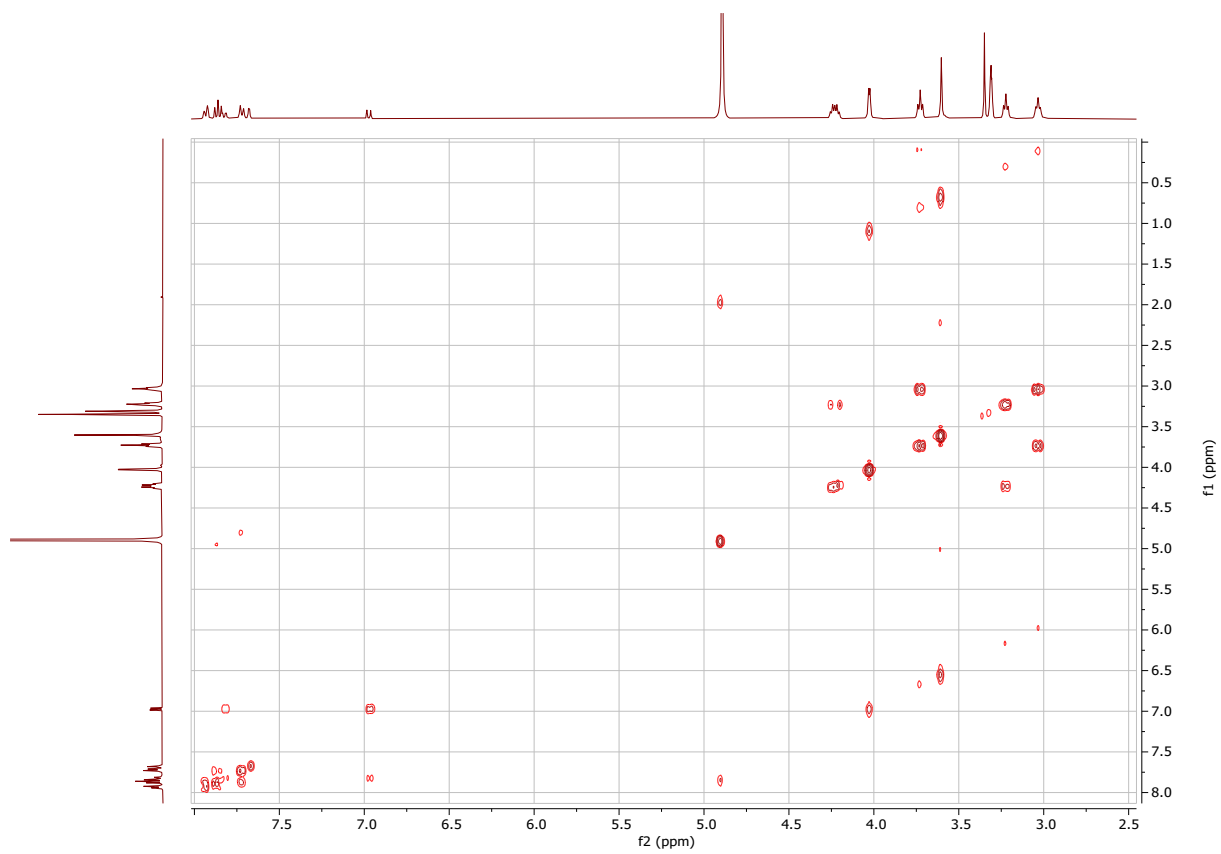

Figure S10.  $^1\text{H}$ - $^1\text{H}$  COSY NMR spectrum of NPK\_PicAm (400 MHz,  $\text{CD}_3\text{OD}$ , 298 K).

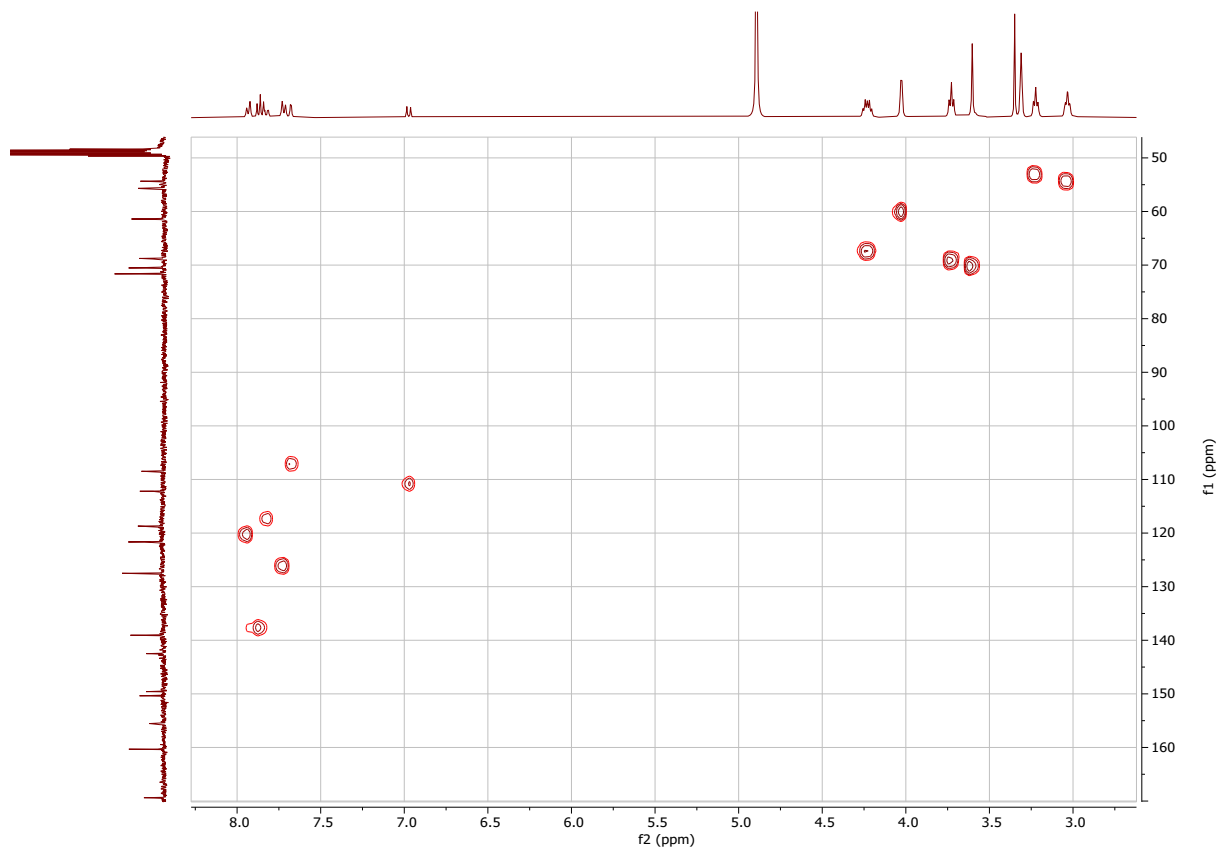

**Figure S11.**  $^1\text{H}$ - $^{13}\text{C}$  HSQC NMR spectrum of NPK\_PicAm ( $\text{CD}_3\text{OD}$ , 298 K).

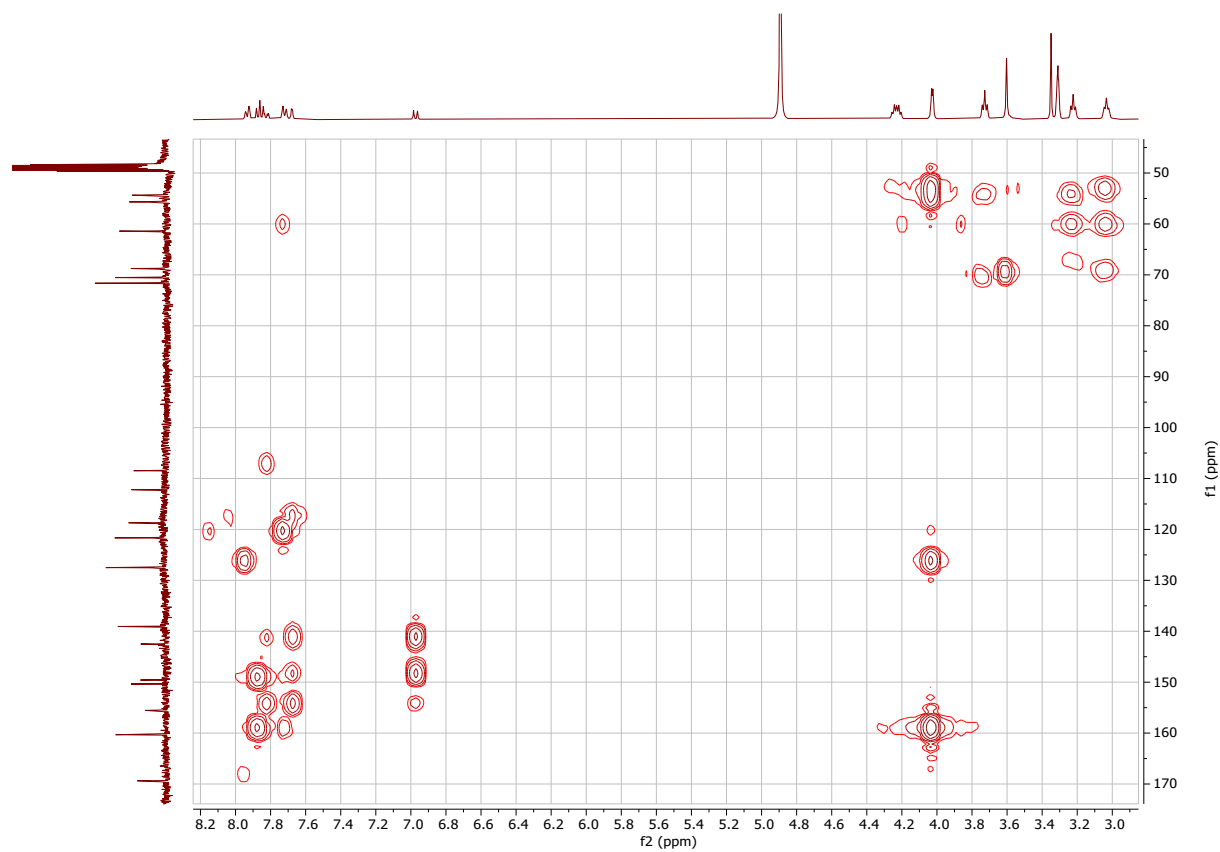

**Figure S12.**  $^1\text{H}$ - $^{13}\text{C}$  HMBC NMR spectrum of NPK\_PicAm ( $\text{CD}_3\text{OD}$ , 298 K).

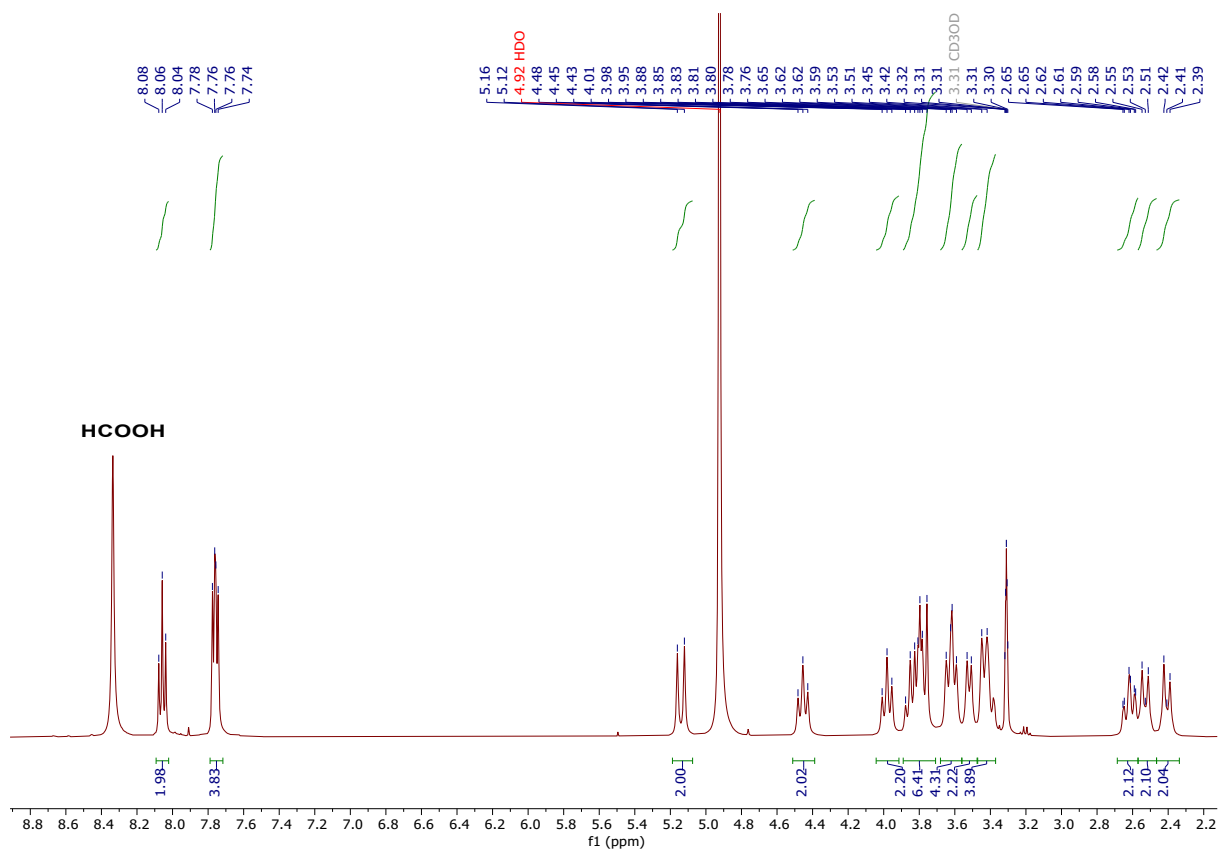

**Figure S13.**  $^1\text{H}$  NMR spectrum of  $[\text{Pb}(\text{K22\_PicAm})]^{2+}$  (400 MHz,  $\text{CD}_3\text{OD}$ , 298 K).

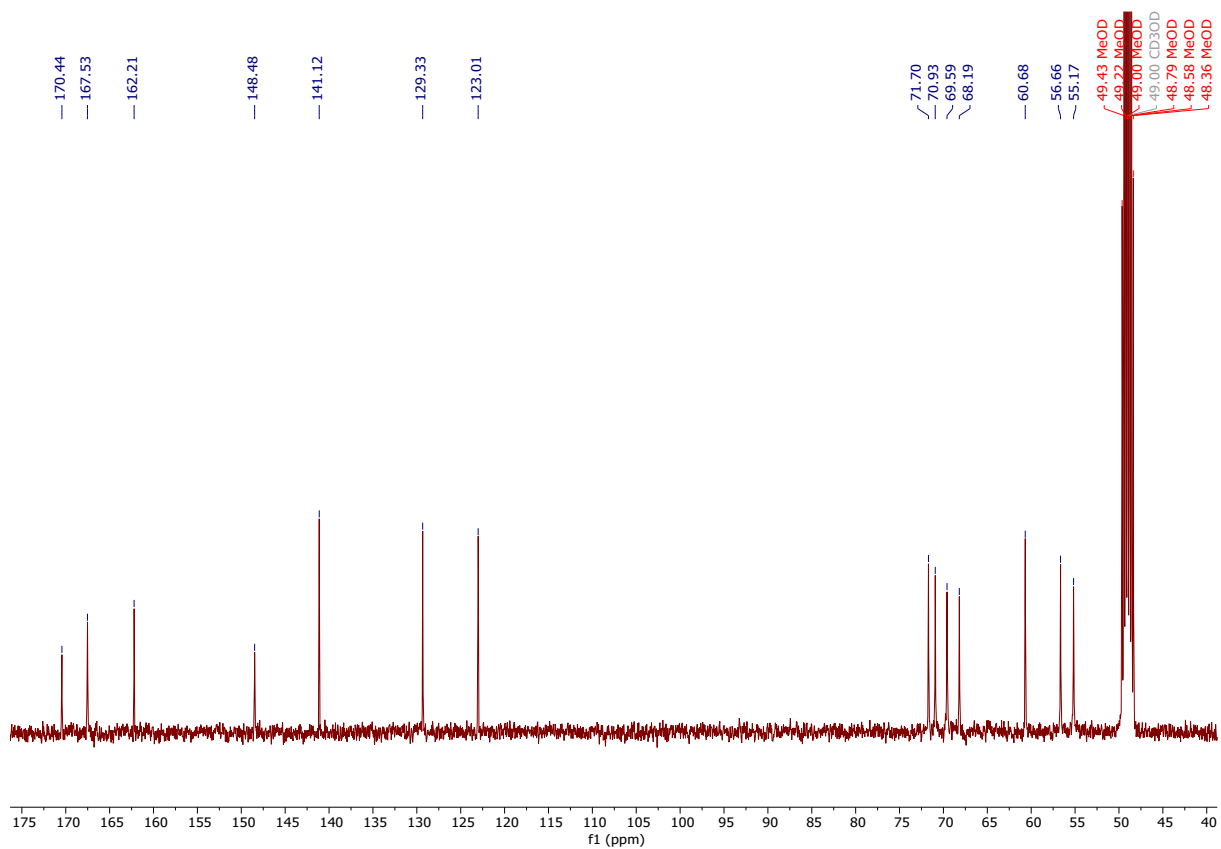

**Figure S14.**  $^{13}\text{C}\{^1\text{H}\}$  NMR spectrum of  $[\text{Pb}(\text{K22\_PicAm})]^{2+}$  (101 MHz,  $\text{CD}_3\text{OD}$ , 298 K).

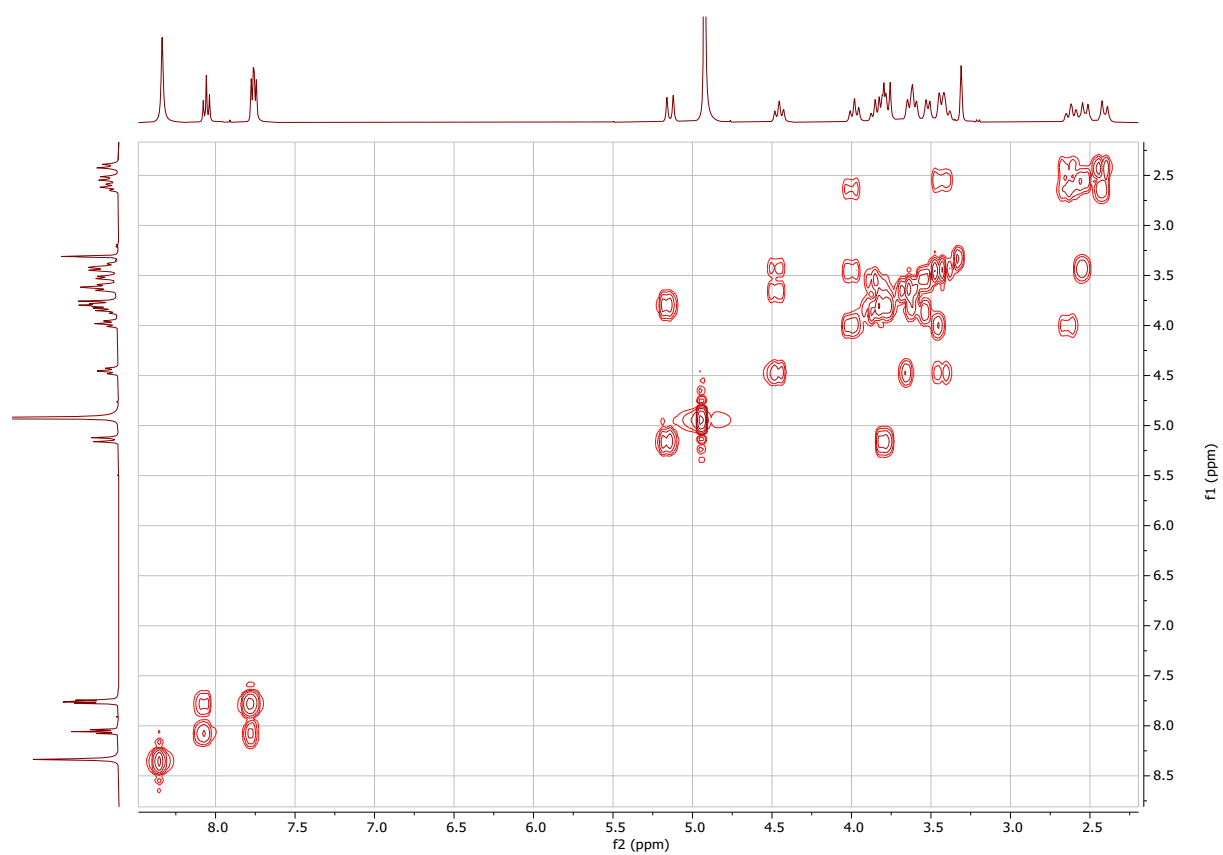

**Figure S15.**  $^1\text{H}\text{-}^1\text{H}$  COSY NMR spectrum of  $[\text{Pb}(\text{K22\_PicAm})]^{2+}$  (400 MHz,  $\text{CD}_3\text{OD}$ , 298 K).

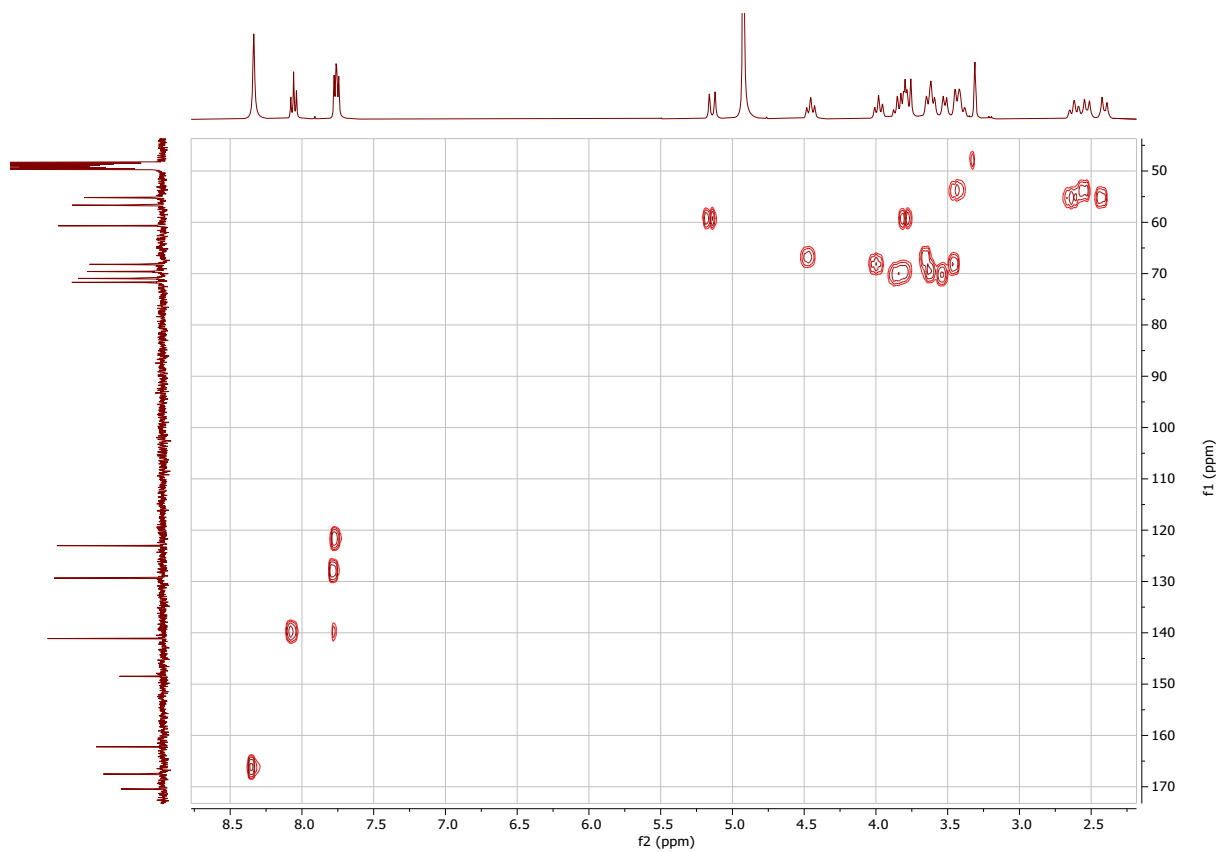

**Figure S16.**  $^1\text{H}$ - $^{13}\text{C}$  HSQC NMR spectrum of  $[\text{Pb}(\text{K22\_PicAm})]^{2+}$  ( $\text{CD}_3\text{OD}$ , 298 K).

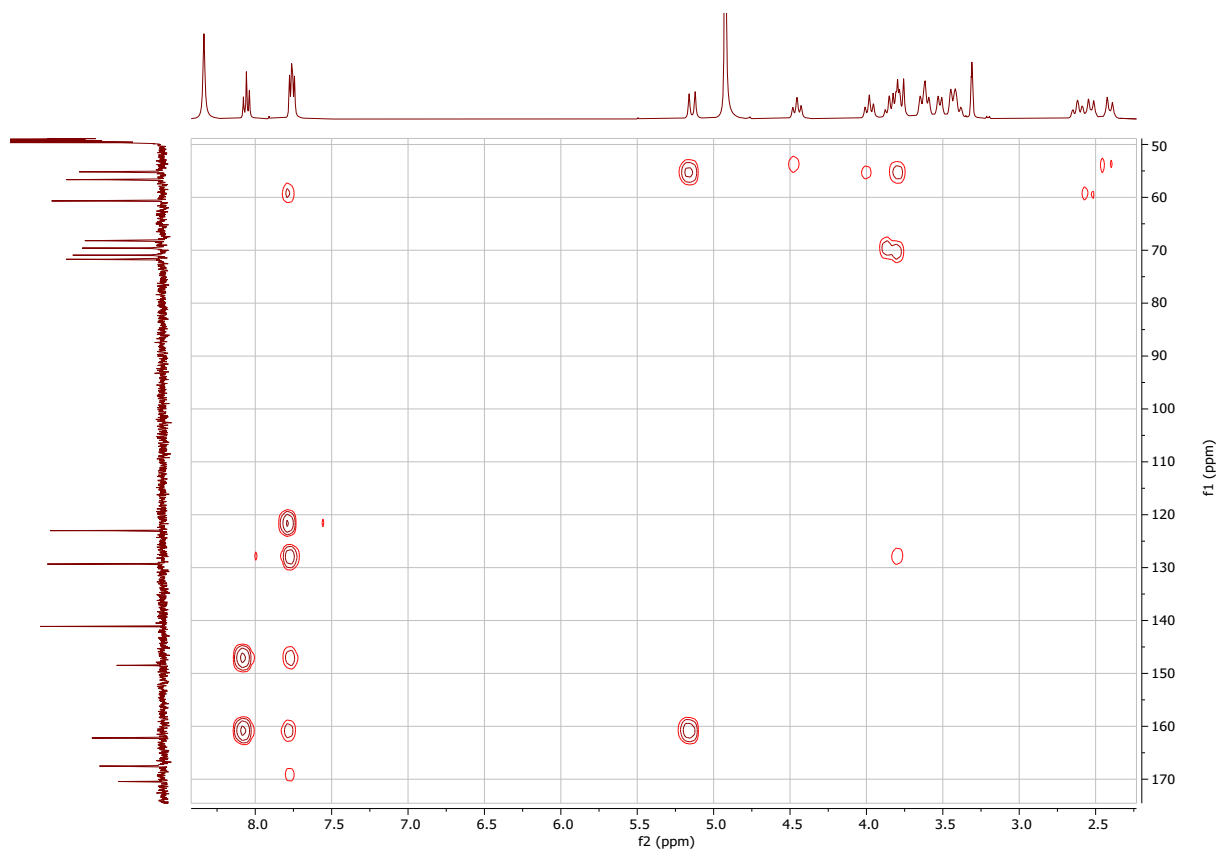

**Figure S17.**  $^1\text{H}$ - $^{13}\text{C}$  HMBC NMR spectrum of  $[\text{Pb}(\text{K22\_PicAm})]^{2+}$  ( $\text{CD}_3\text{OD}$ , 298 K).

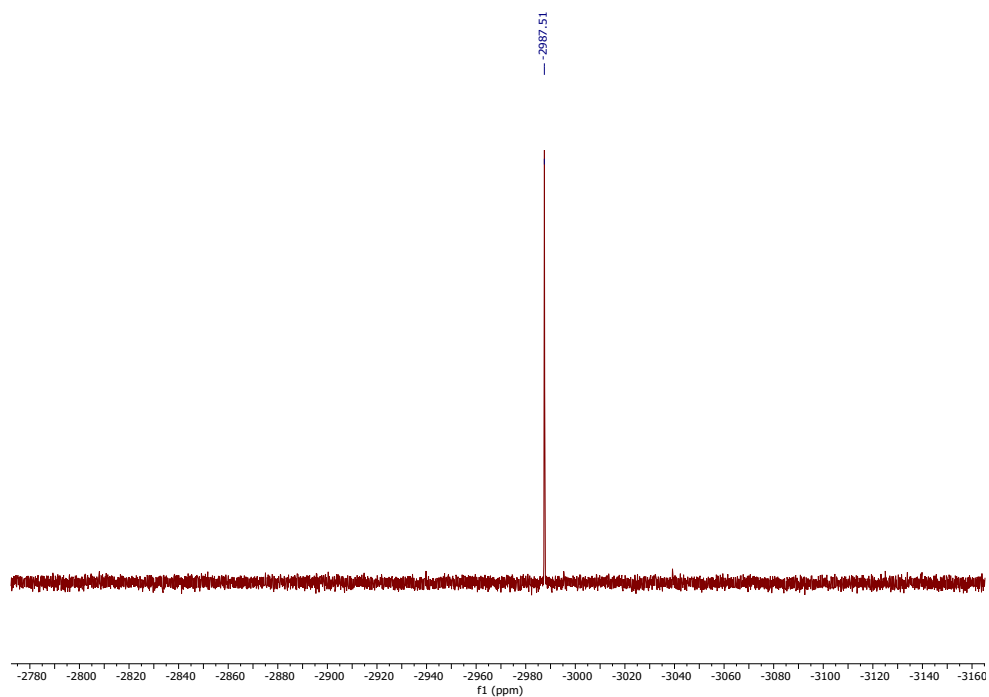

**Figure S18.**  $^{207}\text{Pb}\{^1\text{H}\}$  NMR spectrum of 1 M  $\text{Pb}(\text{NO}_3)_2$  (83 MHz,  $\text{D}_2\text{O}$ , 298 K).

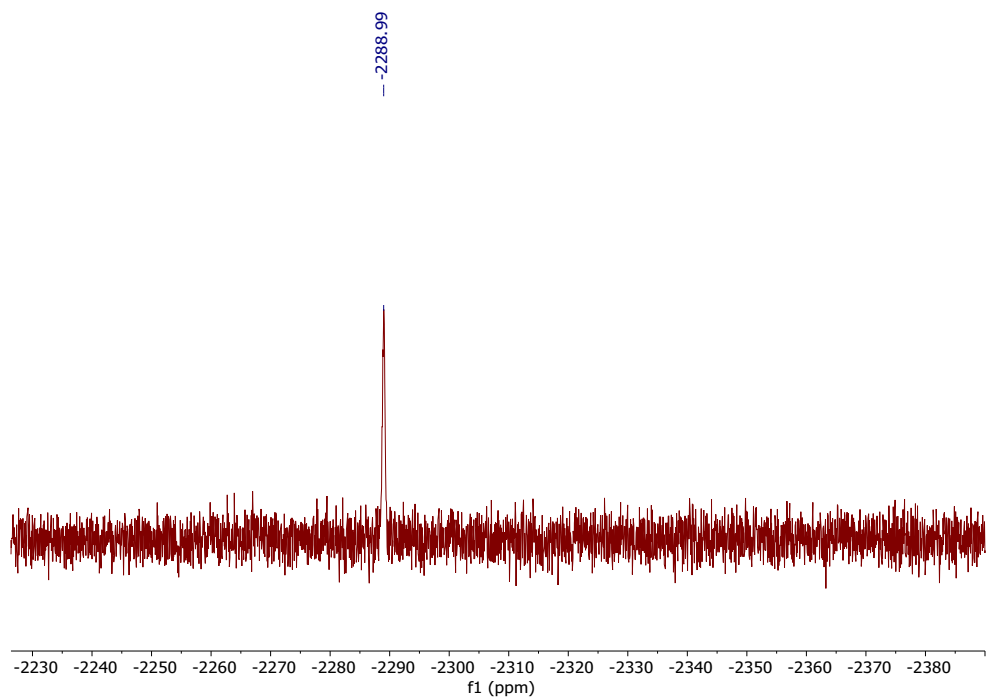

**Figure S19.**  $^{207}\text{Pb}\{^1\text{H}\}$  NMR spectrum of  $[\text{Pb}(\text{K22\_PicAm})]^{2+}$  (84 MHz,  $\text{D}_2\text{O}$ , 298 K).

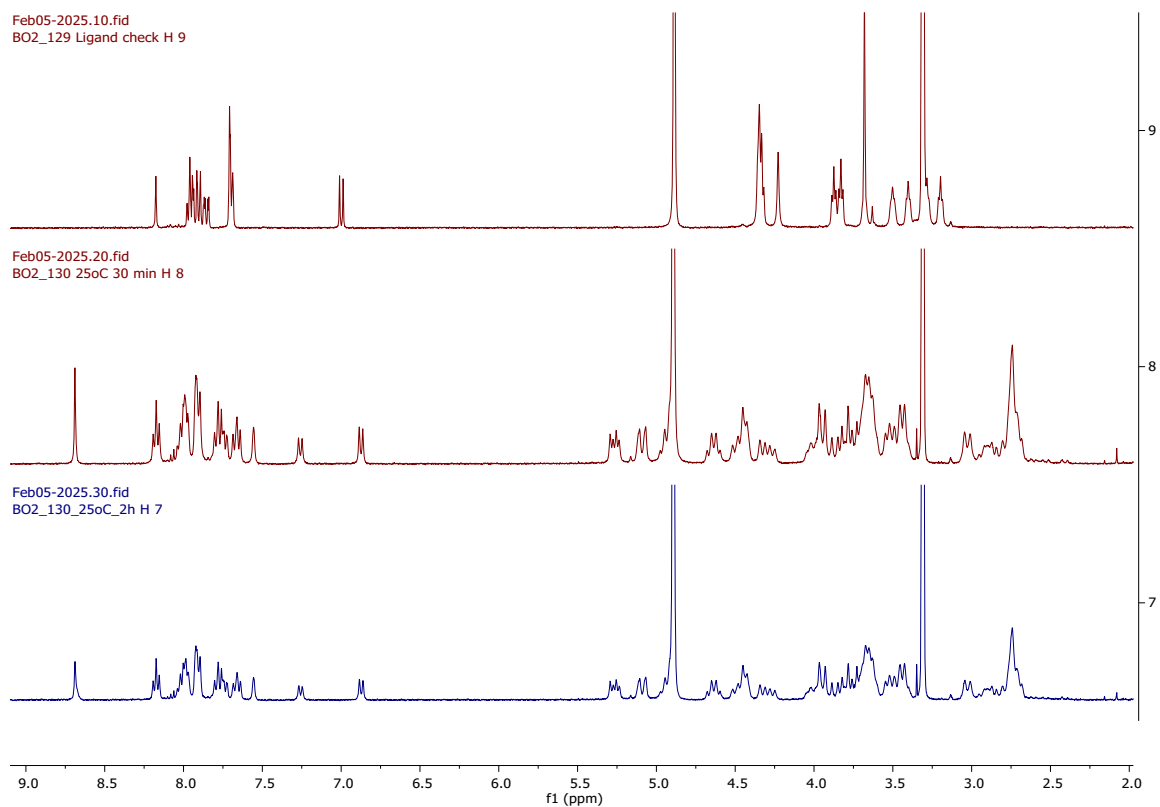

**Figure S20.**  $^1\text{H}$  NMR spectrum of  $\text{Pb}(\text{OAc})_2 \cdot 3\text{H}_2\text{O}$  complexation with **NPK\_PicAm** (400 MHz,  $\text{CD}_3\text{OD}$ , 298 K).

## 7. Mass Spectra

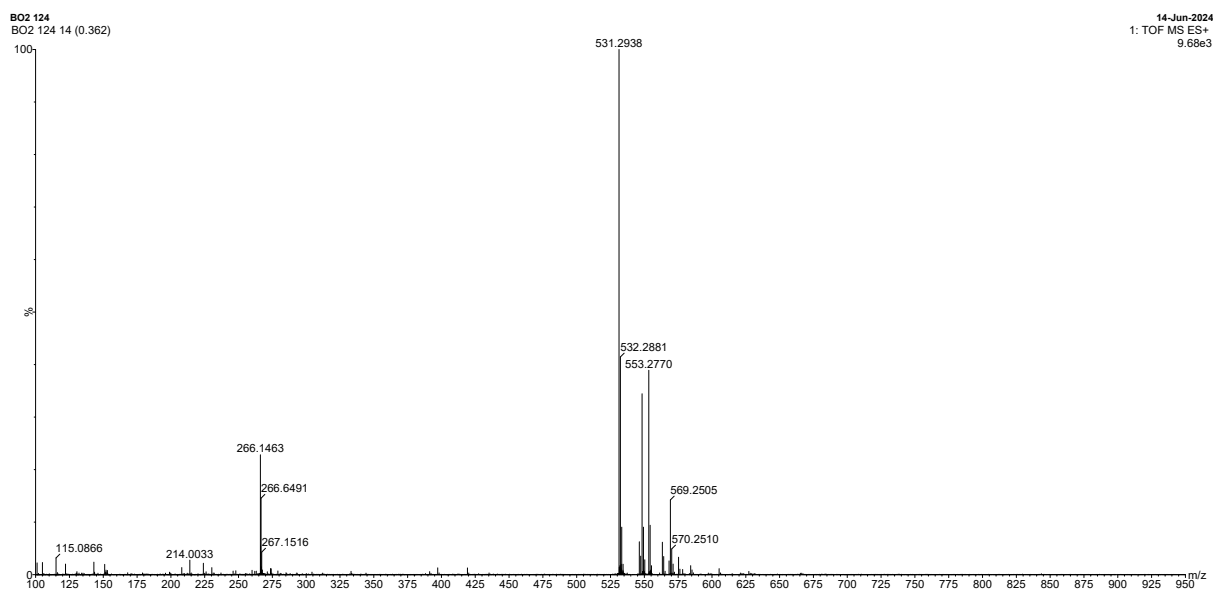

**Figure S21.** HRMS (ES-TOF+) of **K22\_PicAm**.

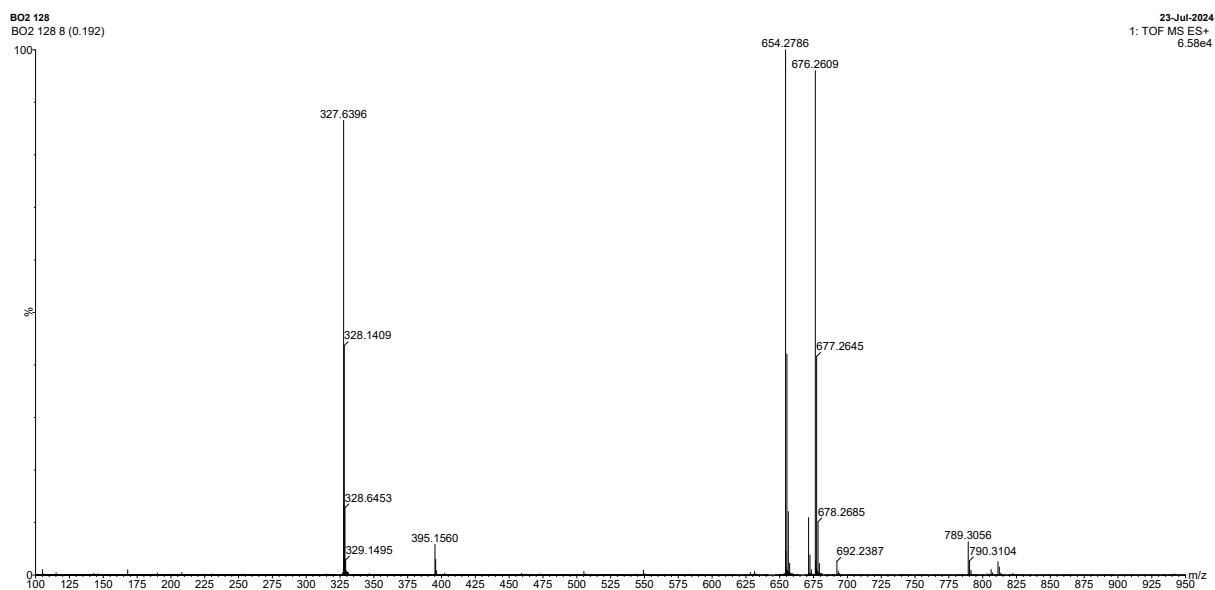

**Figure S22.** HRMS (ES-TOF+) of compound **3**.

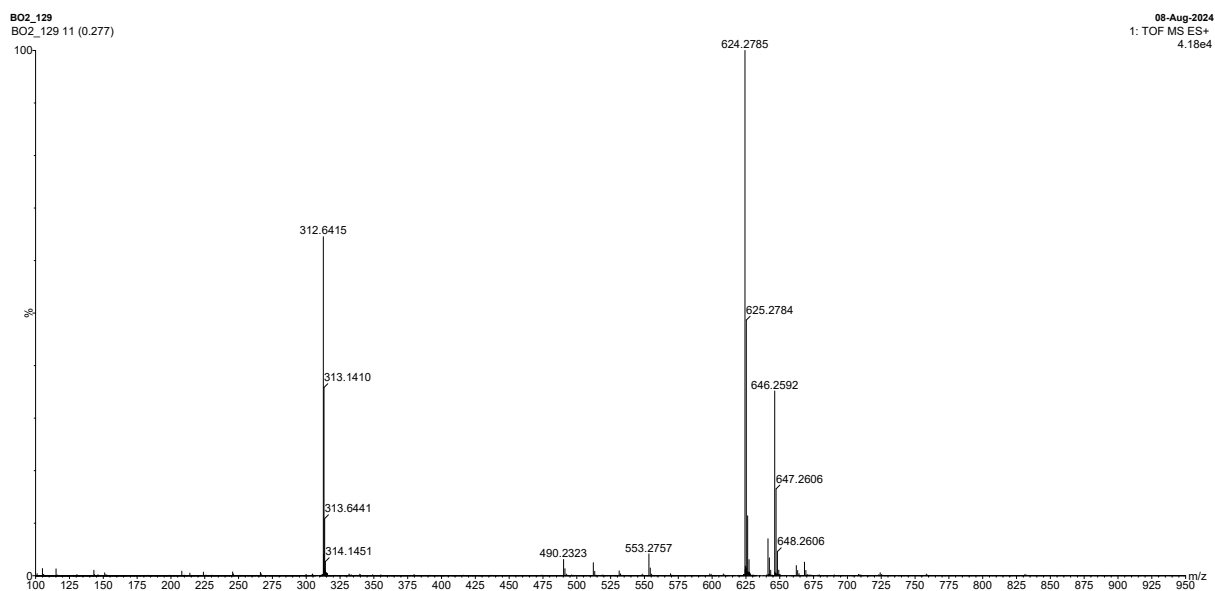

**Figure S23.** HRMS (ES-TOF+) of **NPK\_PicAm**.

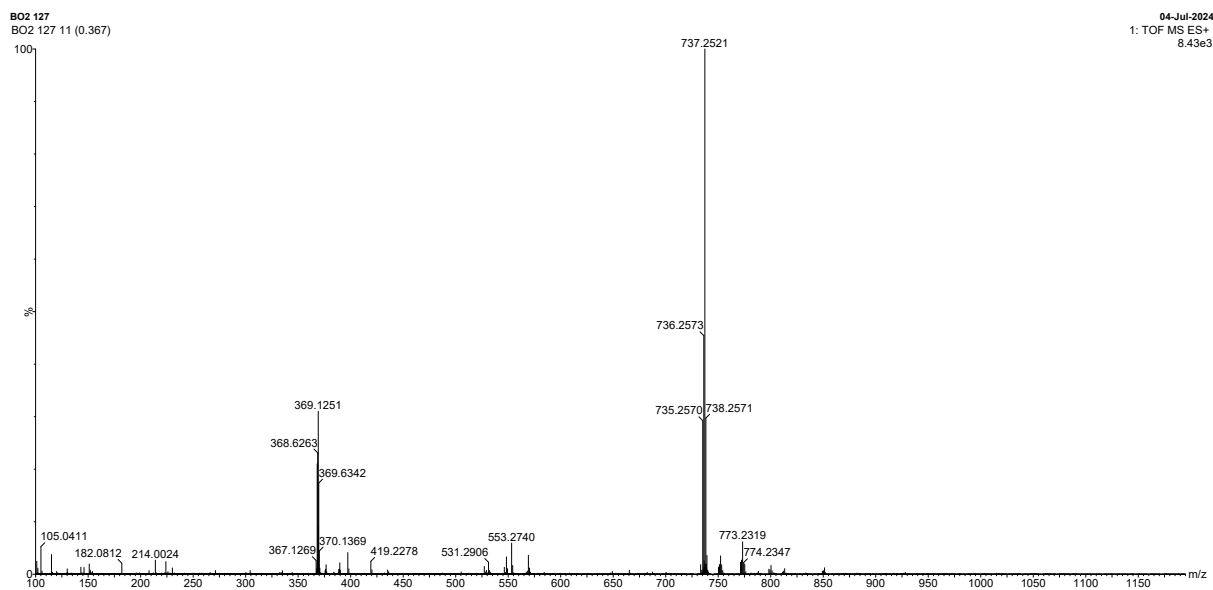

**Figure S24.** HRMS (ES-TOF+) of  $[\text{Pb}(\text{K22\_PicAm})]^{2+}$ .

280824\_33010\_BO\_130 #105-109 RT: 0.25-0.26 AV: 5 NL: 1.60E9  
T: FTMS + p ESI Full ms [100.0000-1000.0000]

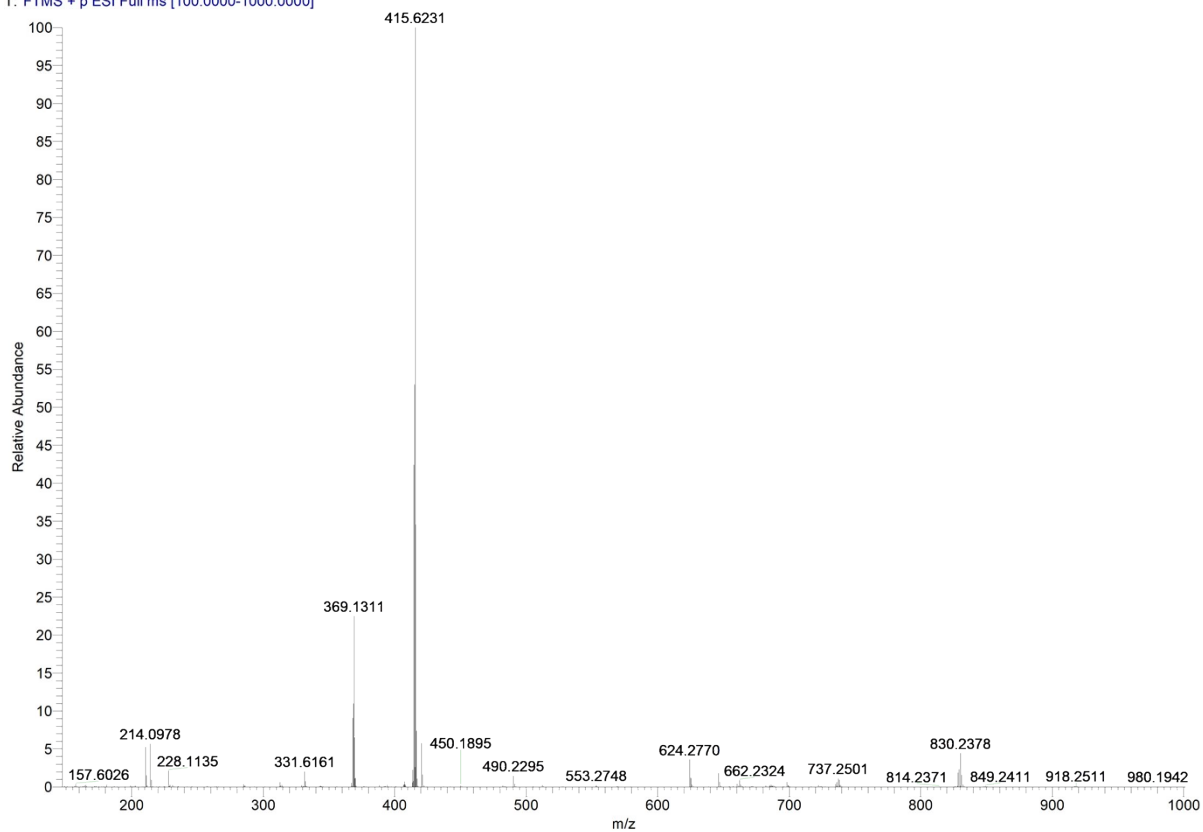

**Figure S25.** HRMS (ES-TOF+) of  $[\text{Pb}(\text{NPK\_PicAm})]^{2+}$ .

## 8. HPLC Spectra

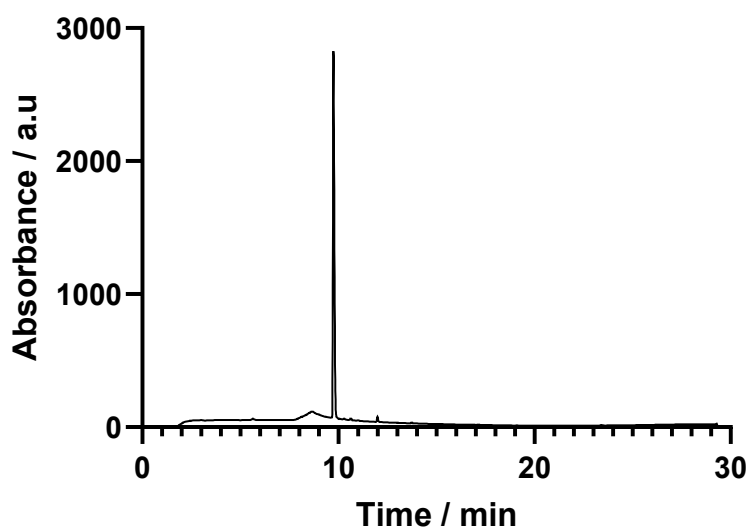

**Figure S26.** HPLC UV trace of **K22\_PicAm**. HPLC was performed on an Agilent 1260 Infinity II HPLC using a ZORBAX Eclipse XDB-C18 column ( $4.6 \times 150$  mm,  $5 \mu\text{m}$ ) and UV spectroscopic detection at 254 nm. Gradient: 0-5 min 5 % B in A, 5-25 min 5-95 % B in A (A =  $\text{H}_2\text{O}$  + 0.1 % TFA, B = MeCN + 0.1 % TFA). Flow rate:  $1 \text{ mL min}^{-1}$ .

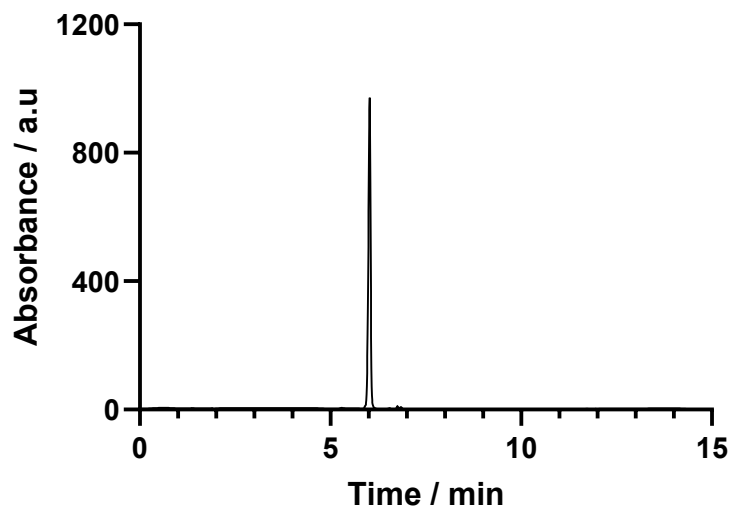

**Figure S27.** HPLC UV trace of **NPK\_PicAm**. HPLC was performed on an Agilent 1260 Infinity II HPLC using a ZORBAX Eclipse XDB-C18 column ( $4.6 \times 150$  mm,  $5 \mu\text{m}$ ) and UV spectroscopic detection at 254 nm. Gradient: 0-5 min 5 % B in A, 5-25 min 5-95 % B in A (A =  $\text{H}_2\text{O}$ , B = MeCN). Flow rate:  $1 \text{ mL min}^{-1}$ .

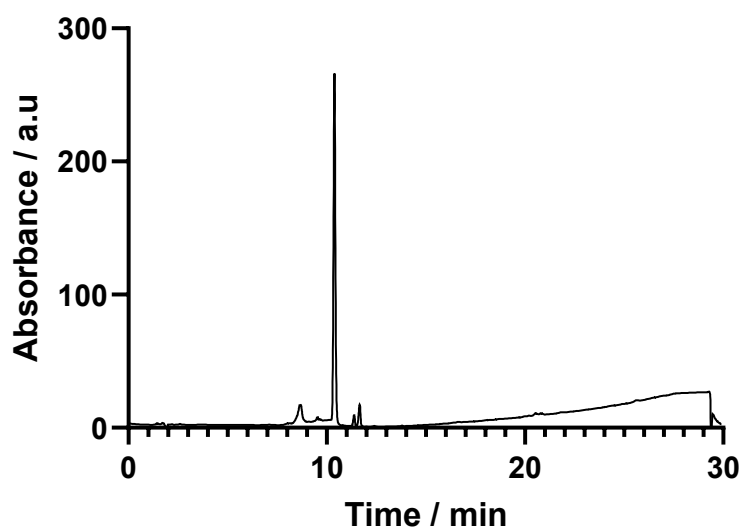

**Figure S28.** HPLC UV trace of  $[\text{Pb}(\text{K22\_PicAm})]^{2+}$ . HPLC was performed on an Agilent 1260 Infinity II HPLC using a ZORBAX Eclipse XDB-C18 column ( $4.6 \times 150$  mm,  $5 \mu\text{m}$ ) and UV spectroscopic detection at 254 nm. Gradient: 0-5 min 5 % B in A, 5-25 min 5-95 % B in A (A =  $\text{H}_2\text{O} + 0.1 \%$  FA, B = MeCN + 0.1 % FA). Flow rate:  $1 \text{ mL min}^{-1}$ .

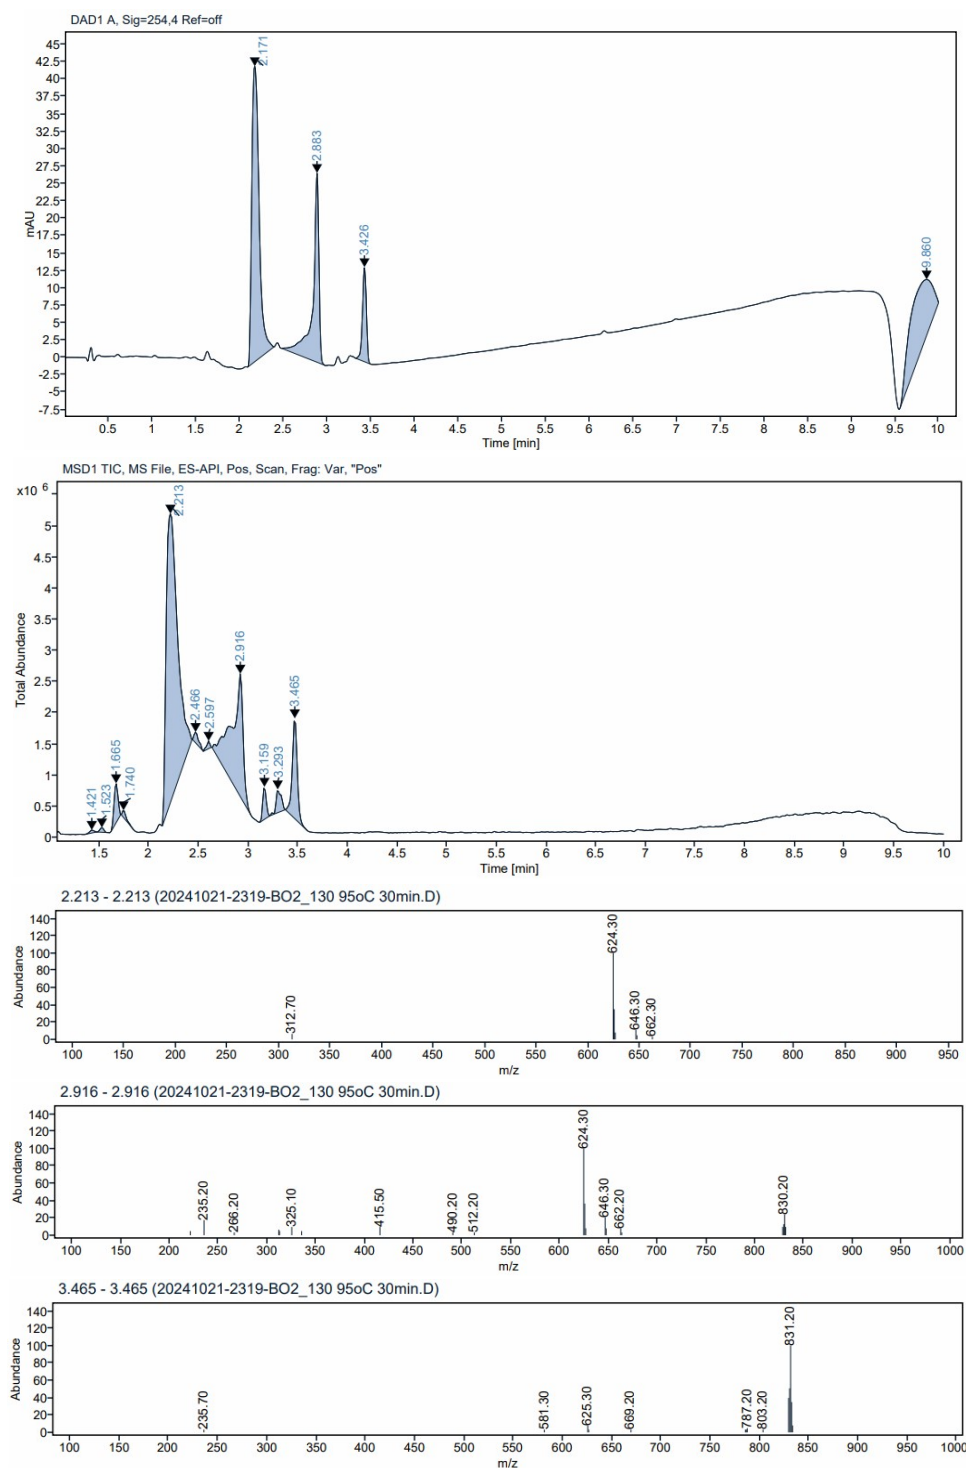

**Figure S29.** LCMS spectra of  $[\text{Pb}(\text{NPK\_PicAm})]^{2+}$  complexation reaction. LCMS was performed on an Agilent 1260 Infinity II HPLC with Single Quad MSD/XT MS. MS: positive and negative (dynamic), scan speed: 2600 u/s, 100-1000 m/z, cycle time: 0.84 s. For compounds more than 1000 Da; dynamic, scan speed: 2600 u/s, 500-3000 m/z, cycle time: 2.07 s. Drying gas flow and temperature: nitrogen, 12 L/min, 350 °C. Nebulizer pressure: 50 psig. Column temperature: 40 °C. Mobile phase A contained H<sub>2</sub>O with 0.1 % formic acid, and mobile phase B contained MeCN with 0.1 % formic acid. Analytical reverse-phase LCMS was conducted using an Agilent Poroshell HPH C18 column (3.0×0.50 mm, 2.7 μm) and UV spectroscopic detection at 210 nm and 360 nm. Eluent gradient: 0 % B in A, 0-100 % B in A for 7 minutes, 0-100 % B in A for 1 minute, 100-50 % B in A for 0.17 minutes, 50 % B in A for 1.83 minutes; flow rate 0.8 mL min<sup>-1</sup>.

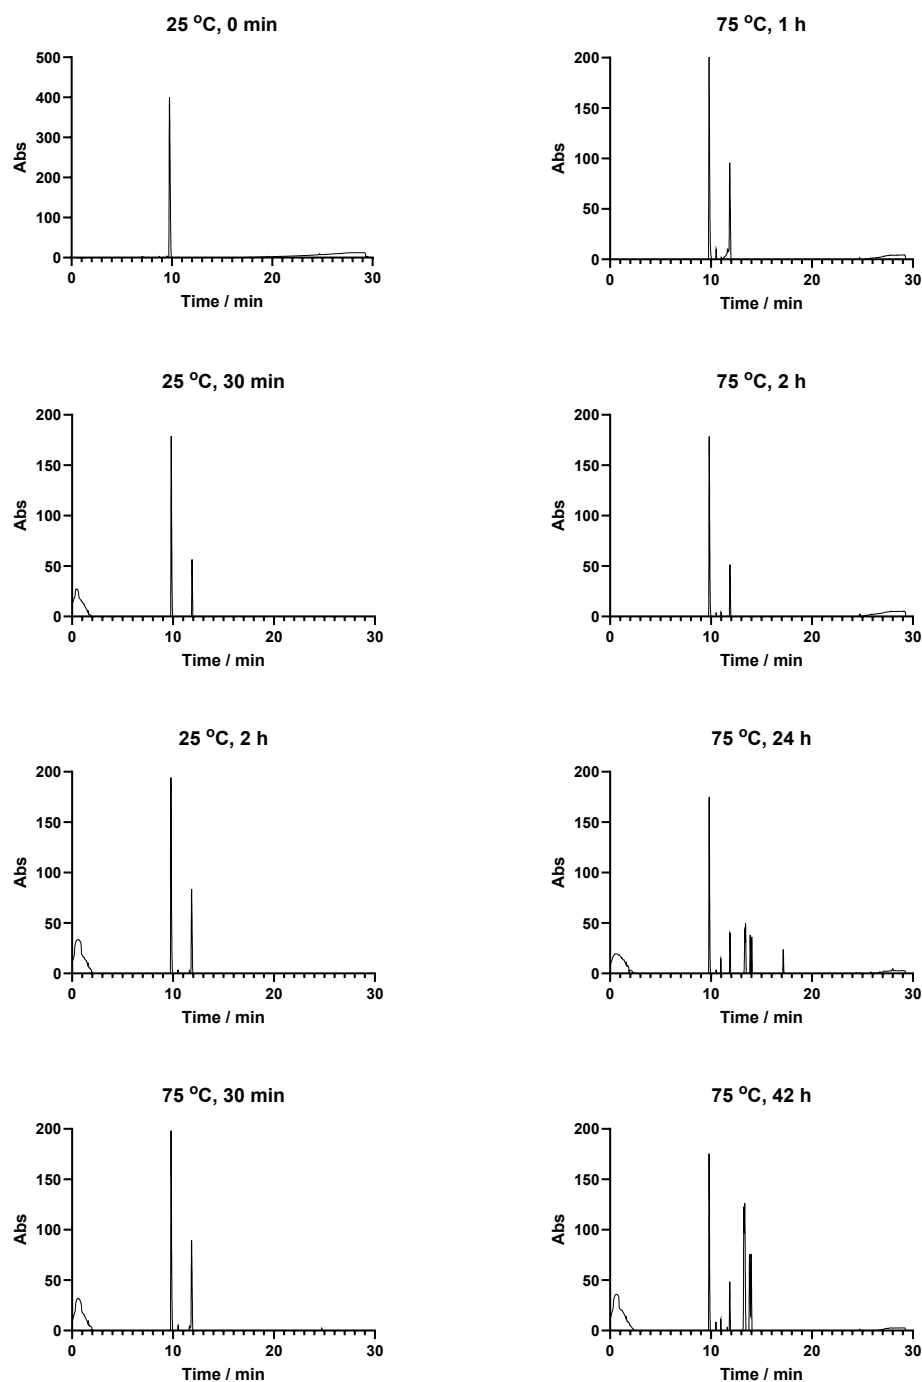

**Figure S30.** HPLC UV trace of  $\text{Pb}(\text{OAc})_2 \cdot 3\text{H}_2\text{O}$  complexation with  $\text{NPK\_PicAm}$ . HPLC was performed on an Agilent 1260 Infinity II HPLC using a ZORBAX Eclipse XDB-C18 column ( $4.6 \times 150$  mm,  $5 \mu\text{m}$ ) and UV spectroscopic detection at 254 nm. Gradient: 0-5 min 5 % B in A, 5-25 min 5-95 % B in A (A =  $\text{H}_2\text{O} + 0.1$  % FA, B =  $\text{MeCN} + 0.1$  % FA). Flow rate:  $1 \text{ mL min}^{-1}$ .

## 9. Potentiometric Titration and UV-Vis Spectroscopy Measurements

Potentiometric titrations were carried out using a Metrohm Titrando 888 titrator equipped with a combined glass electrode (Metrohm model 6.0260.010) and a Metrohm 801 Stirrer unit. This titration system was controlled by *Tiamo* (ver. 2.34) software. The titration vessel was fitted into a removable

glass cell ( $\approx 70$  mL) and thermostated at  $25.0$  °C ( $pK_w(\text{NaCl}, 0.1 \text{ M}) = 13.78$ )<sup>4</sup> using a circulating water bath.  $\text{CO}_2$  was excluded from the vessel prior to and during the titrations by a nitrogen flow, which was passed through an aqueous solution.  $\text{NaOH}$  ( $0.1 \text{ M}$ ) was standardized by potentiometric titration against potassium hydrogen phthalate. Hydrochloric acid ( $0.1 \text{ M}$ ) was standardized against Tris (base form). Titration solutions were maintained at a constant ionic strength of  $0.1 \text{ M}$  with  $\text{NaCl}$  (prepared by adding  $5.8 \text{ g}$   $\text{NaCl}$  to  $1 \text{ L}$  de-ionised  $\text{H}_2\text{O}$ ). The electrode was calibrated before each titration by titrating a solution of standardized  $\text{HCl}$  with standardized  $\text{NaOH}$ , and the data were analysed using the program *GLEE5* (ver. 3.0.21)<sup>5</sup> to obtain the standard electrode potential and slope factor.  $\text{Pb}^{2+}$  stock solution was made by dissolving the corresponding perchlorate salts ( $98 \%$  purity or higher) in  $\text{H}_2\text{O}$ . The exact concentrations were determined by complexometric titrations<sup>6</sup> with a standardized  $0.01 \text{ M}$   $\text{EDTA}$  solution. The complexometric titrations were performed in water, and the end point was indicated by Eriochrome Black T. Ligand aliquots were added directly into the electrolyte solution prior to analysis.

Protonation constant or stability constant determinations were carried out by titrating an acidic solution containing free ligand or both ligand and metal (in  $30 \text{ mL}$   $0.1 \text{ M}$   $\text{NaCl}$ ) with standardized  $0.1 \text{ M}$   $\text{NaOH}$ . For protonation constant determinations, the amount of ligand used was  $0.02 \text{ mmol}$ . For stability constant determinations, the amount of ligand used was  $0.02 \text{ mmol}$  and amount of metal ion used was  $0.018 \text{ mmol}$ . The solutions were inspected throughout the titrations for signs of  $\text{Pb}(\text{OH})_2$  precipitation. The titration data were refined with *Hyperquad 2013*<sup>4</sup> software to determine protonation and stability constants. The data points within the  $\text{pH}$  range of  $2.6$ – $11.3$  were used for analysis. At least three independent titrations for protonation constant measurements and three titrations for stability constant measurements were carried out for each L and PbL system.

Equilibration between the addition of  $\text{NaOH}$  aliquots was monitored via the electrode potential. If the system is not at equilibrium, the electrode potential will drift as the system continues to adjust. To ensure that the thermodynamic equilibration is reached after an aliquot of  $\text{NaOH}$  is added, the next  $\text{NaOH}$  aliquot was not added until either the electrode drifting is slow ( $< 0.2 \text{ mV/min}$ ), or a maximum time limit is reached ( $2 \text{ min}$  for both protonation constant determinations and stability constant determinations).

The UV-Vis spectra were recorded using a Cary 60 spectrophotometer. The water was distilled twice and passed through a Millipore apparatus. The  $\text{pH}$  values were measured using a Metler-Toledo  $\text{pH}$  meter, and the hydrogen ion concentration of the solutions was adjusted using diluted  $\text{HCl}$  and  $\text{NaOH}$  solutions. The ligand concentration in the working solutions was determined by titration with known amounts of lead(II) at fixed  $\text{pH}$  values of  $3$  and  $7$ , at which quantitative formation of the complexes occurs. To fix the  $\text{pH}$  at  $7$ , a Tris-buffered solution was employed in some of the titrations; see Fig. S39, for examples.

To assess complex thermodynamic stability, the ligand protonation constants ( $\log K_i$ ) and Pb-ligand stability complexes ( $\log K_{\text{PbL}}$ ) were determined via potentiometric titrations. Protonation and stability constants are defined in **Equations S1** and **S2** respectively, where (L) represents the equilibrium concentrations of fully deprotonated ligand.

$$K_i = \frac{[H_iL]}{[H^+][H_i - 1L]}$$

$$K_{PbL} = \frac{[PbL]}{[Pb^{2+}][L]}$$

**Equation S1:**  
i = number of protons

**Equation S2:**  
L = K<sub>22</sub>PicAm or  
NPK\_PicAm

Potentiometric titrations use the change in measured potential to calculate protonation ( $K_a$ ) and stability constants ( $K_{PbL}$ ) using the Nernst Equation (**Equation S3**). The  $E^0$  is measured during the calibration measurements, and the  $E$  is the measured potential during the experiment. At defined temperature and ionic strength conditions,  $\log K$  values can be calculated.

$$E = E^0 - \frac{2.303RT}{nF} \log_{10}K$$

**Equation S3:** The Nernst Equation used for the calculation of  $\log_{10}K$   
E = measured difference in potential  
 $E^0$  = calibration value for difference in potential  
n = number of protons transferred

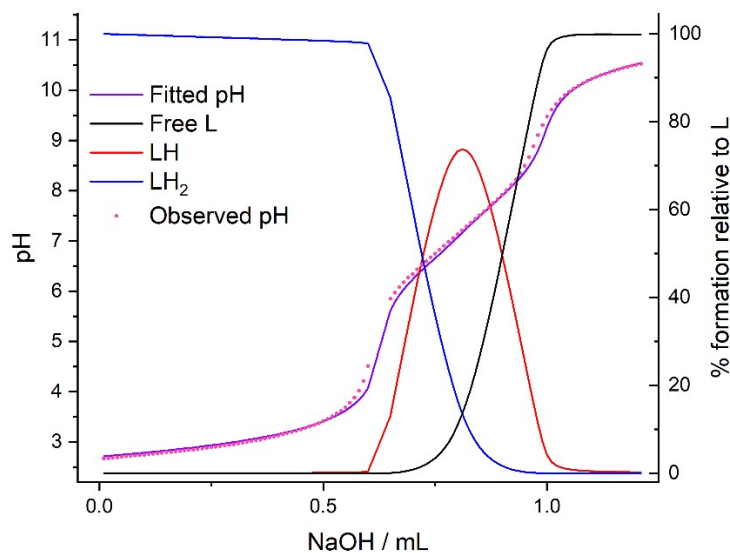

**Figure S31.** Representative protonation constant determination of **K22\_PicAm** by potentiometric titrations.  $C_{K22\_PicAm} = 0.02$  mmol. Initial volume  $V = 31.5$  mL. Data fitting and speciation distribution over the pH range shown.

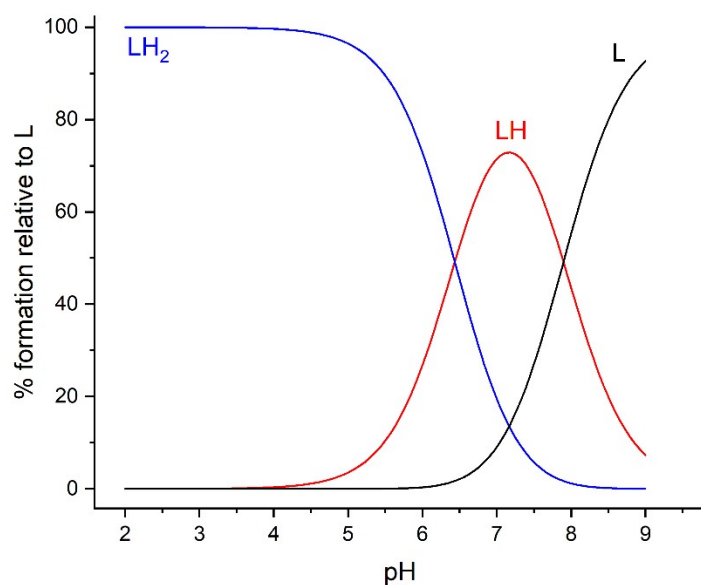

**Figure S32.** Representative species distribution of **K22\_PicAm** modelled in HySS.  $C_{\text{K22\_PicAm}} = 0.02$  mmol. Initial volume  $V = 31.5$  mL. Data fitting and speciation distribution over the pH range shown.

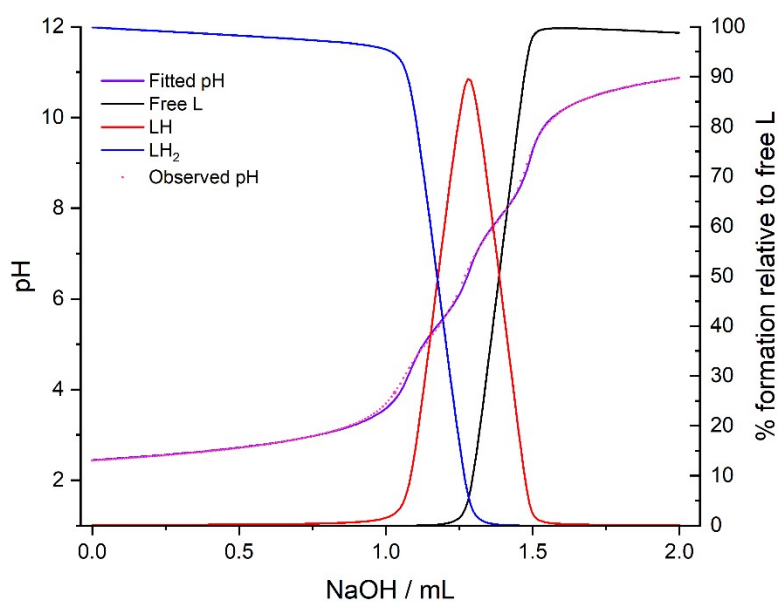

**Figure S33.** Representative protonation constant determination of **NPK\_PicAm** by potentiometric titrations.  $C_{\text{NPK\_PicAm}} = 0.02$  mmol. Initial volume  $V = 31.5$  mL. Data fitting and speciation distribution over the pH range shown.

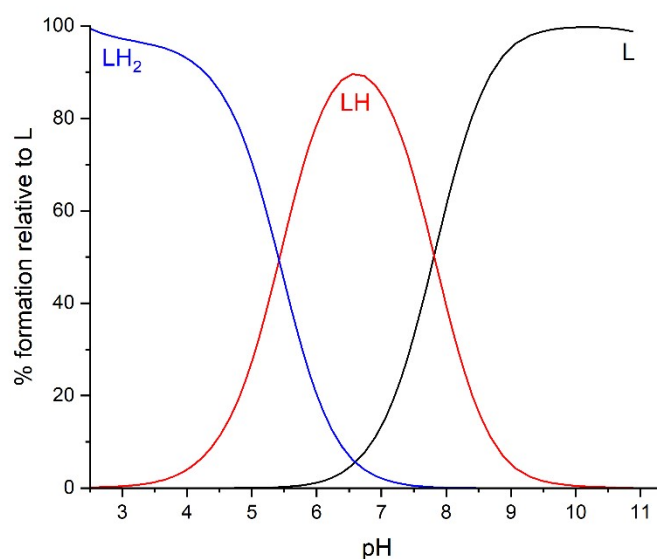

**Figure S34.** Representative species distribution of **NPK\_PicAm** modelled in HySS.  $C_{\text{NPK\_PicAm}} = 0.02$  mmol. Initial volume  $V = 31.5$  mL. Data fitting and speciation distribution over the pH range shown.

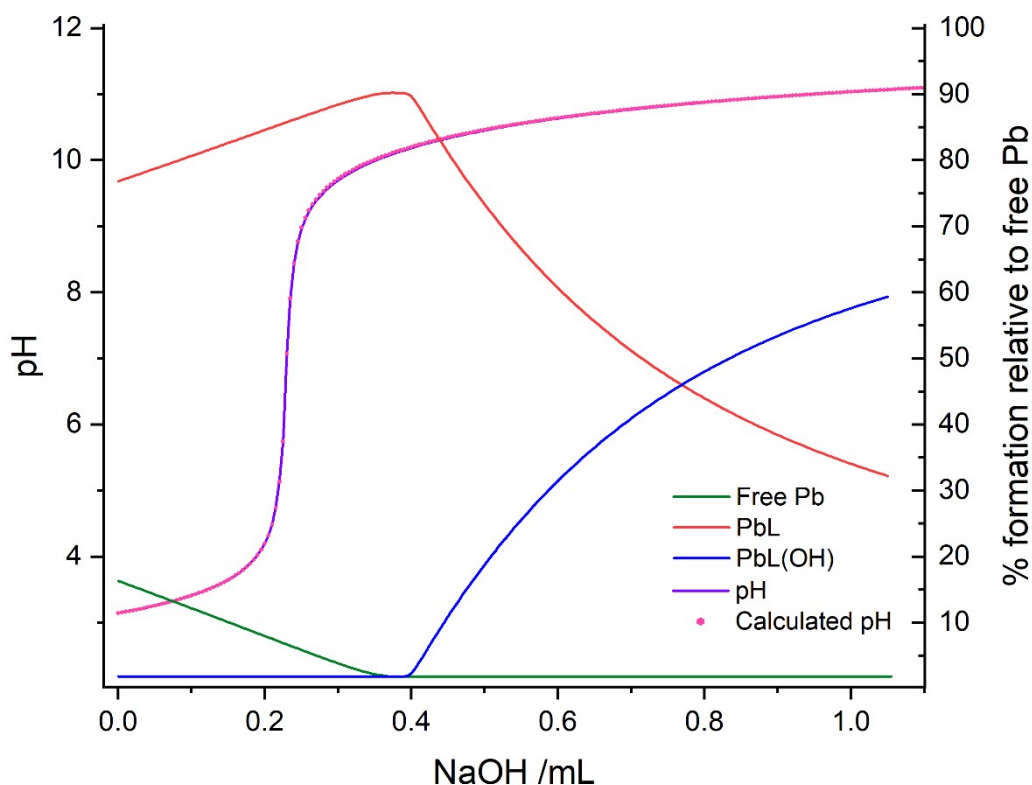

**Figure S35.** Representative stability constant determination of  $[\text{Pb}(\text{NPK\_PicAm})]^{2+}$  by potentiometric titrations.  $C_{\text{K22\_PicAm}} = 0.02$  mmol.  $C_{\text{Pb}} = 0.018$  mmol. Initial volume  $V = 30.6$  mL. Data fitting and speciation distribution over the pH range shown.

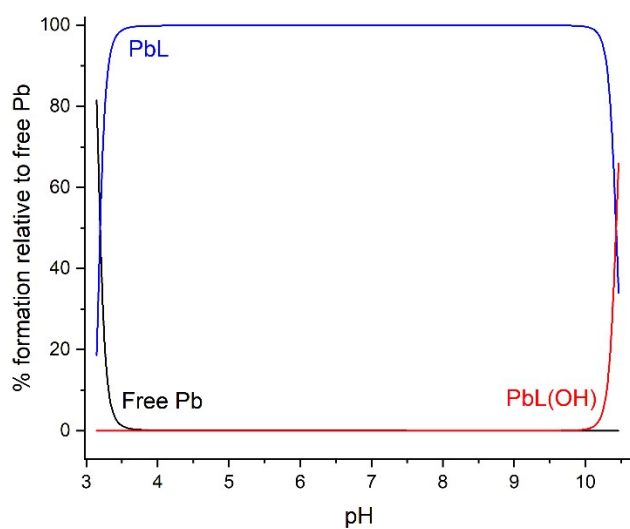

**Figure S36.** Representative species distribution of  $[\text{Pb}(\text{NPK\_PicAm})]^{2+}$  modelled in HySS.  $C_{\text{K22\_PicAm}} = 0.02$  mmol.  $C_{\text{Pb}} = 0.018$  mmol. Initial volume  $V = 30.6$  mL. Data fitting and speciation distribution over the pH range shown.

**A**

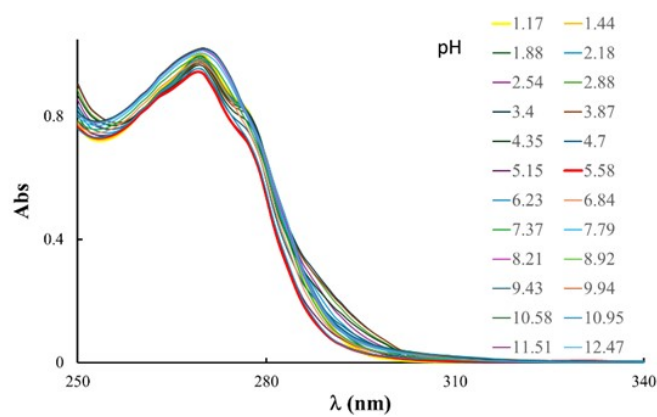

**B**

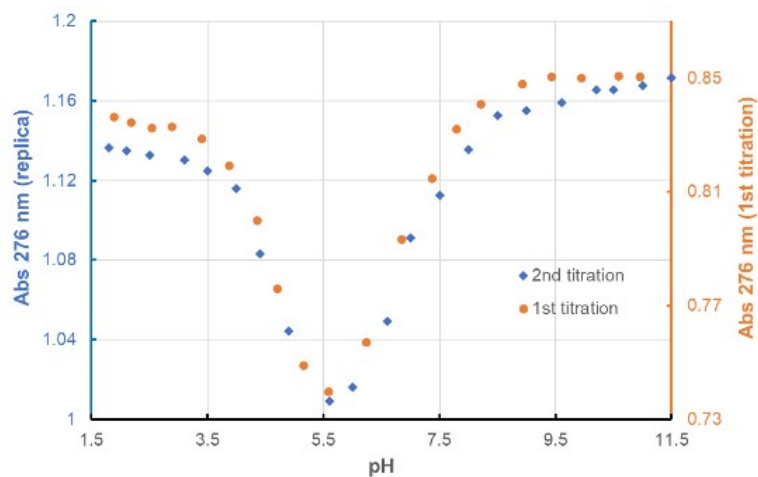

**Figure S37.** A) Changes in the absorption spectra of a  $7.4 \times 10^{-5}$  M solution of **K22\_PicAm** in 0.15 M NaCl at different pH values (repeat 2). B) Representation of the absorbance at 276 nm vs. pH showing the values obtained from different repeats (repeat 1, blue dots; repeat two, orange dots).

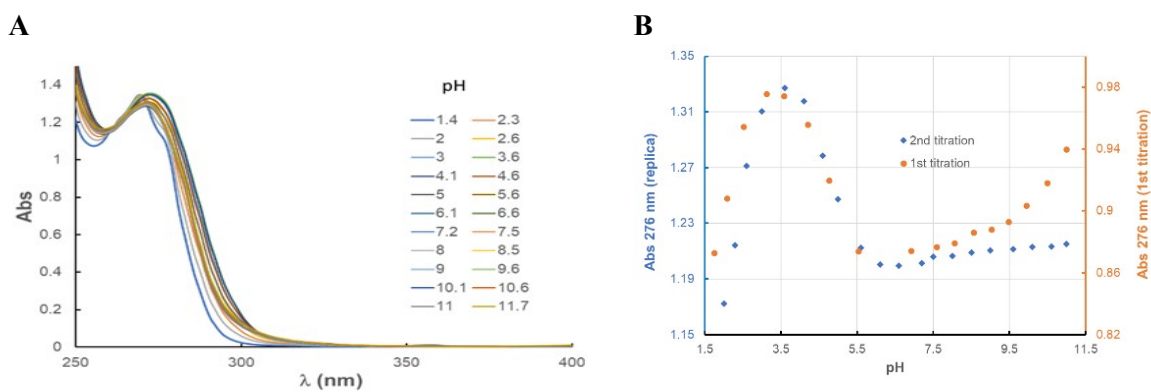

**Figure S38.** A) Changes in the absorption spectra of a  $7.4 \times 10^{-5}$  M solution of **K22\_PicAm** containing an equimolar amount of  $\text{Pb}^{2+}$  in 0.15 M NaCl at different pH values (repeat 2). B) Representation of the absorbance at 276 nm vs pH showing the values obtained from different repeats (repeat 1, blue dots; repeat two, orange dots).

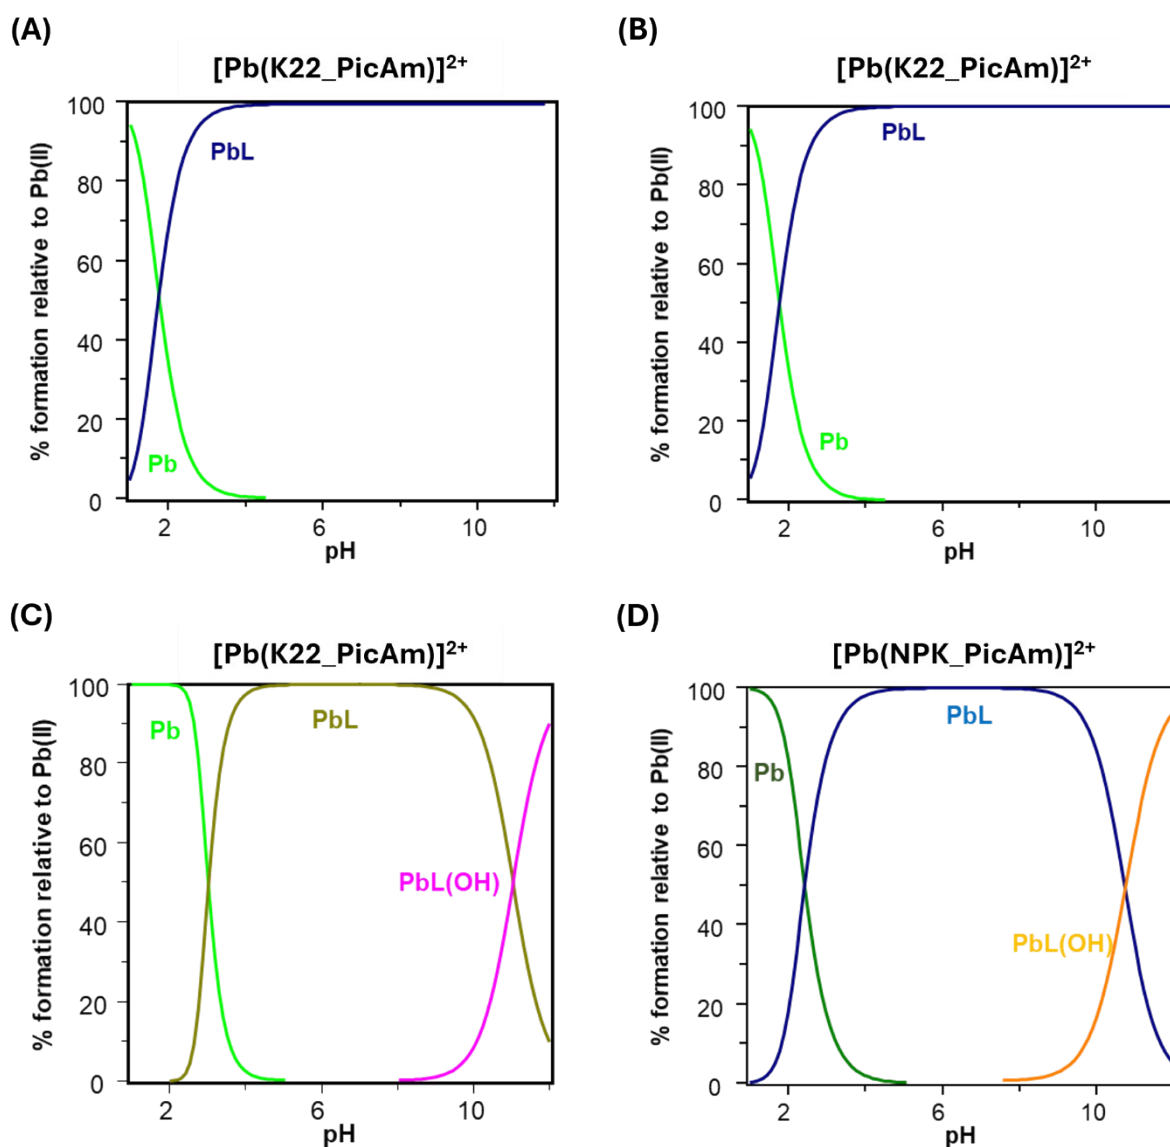

**Figure S39.** Speciation diagram of the system  $\text{Pb}^{2+}$ -L calculated from the stability constants determined from the spectroscopic data  $[\text{Pb}^{2+}] = [\text{L}] = 1 \times 10^{-3}$  M. A) Potentiometric data. B) Data from Regueiro-Figueroa *et al.*<sup>3</sup> C) Data using values from the four-protonation constant UV model. D) Species distribution for the system  $\text{Pb}^{2+}$ -NPK\_Picam.

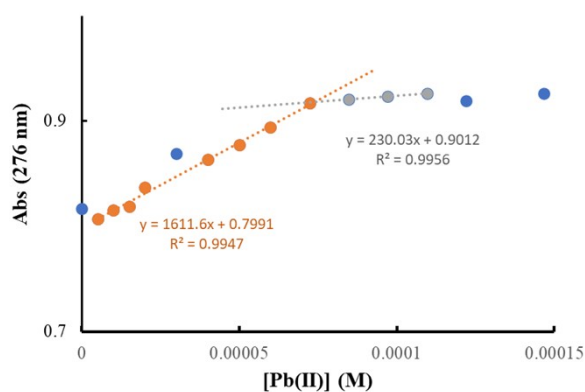

**Figure S40.** Example of a titration of the ligand with a  $\text{Pb}^{2+}$  solution at constant pH. Dots represent the absorbance at 276 nm.

## 10. Crystal Data and Structure Refinement Details for $[\text{Pb}(\text{K22\_PicAm})] \cdot 2\text{PF}_6$

Single crystals of  $[\text{Pb}(\text{K22\_PicAm})] \cdot 2\text{PF}_6$  suitable for X-ray diffraction studies were isolated from the addition of excess  $\text{NH}_4\text{PF}_6$  to an aqueous solution of  $[\text{Pb}(\text{K22\_PicAm})][\text{OAc}]_2$ , which was concentrated under reduced pressure, dissolved in DMF and slowly evaporated.

**Table S2.** Crystal data and structure refinement for  $[\text{Pb}(\text{K22\_PicAm})] \cdot 2\text{PF}_6$  (NL2416).

|                                   |                                                                                                                                   |                |
|-----------------------------------|-----------------------------------------------------------------------------------------------------------------------------------|----------------|
| Identification code               | NL2416                                                                                                                            |                |
| Formula                           | $\text{C}_{26}\text{H}_{38}\text{N}_6\text{O}_6\text{Pb} \cdot 2(\text{F}_6\text{P})$ ,<br>$1.75(\text{C}_3\text{H}_7\text{N O})$ |                |
| Formula weight                    | 1155.67                                                                                                                           |                |
| Temperature                       | 173(2) K                                                                                                                          |                |
| Diffractometer, wavelength        | Agilent Xcalibur PX Ultra A, 1.54184 Å                                                                                            |                |
| Crystal system, space group       | Tetragonal, I4/m                                                                                                                  |                |
| Unit cell dimensions              | $a = 28.02150(16)$ Å                                                                                                              | $a = 90^\circ$ |
|                                   | $b = 28.02150(16)$ Å                                                                                                              | $b = 90^\circ$ |
|                                   | $c = 22.63094(16)$ Å                                                                                                              | $g = 90^\circ$ |
| Volume, Z                         | $17769.9(2)$ Å <sup>3</sup> , 16                                                                                                  |                |
| Density (calculated)              | 1.728 Mg/m <sup>3</sup>                                                                                                           |                |
| Absorption coefficient            | $9.011 \text{ mm}^{-1}$                                                                                                           |                |
| F(000)                            | 9184                                                                                                                              |                |
| Crystal colour / morphology       | Colourless blocks                                                                                                                 |                |
| Crystal size                      | $0.411 \times 0.083 \times 0.073 \text{ mm}^3$                                                                                    |                |
| q range for data collection       | 3.907 to 73.547°                                                                                                                  |                |
| Index ranges                      | $-34 \leq h \leq 34$ , $-34 \leq k \leq 34$ , $-27 \leq l \leq 28$                                                                |                |
| Reflns collected / unique         | 138305 / 9170 [R(int) = 0.0510]                                                                                                   |                |
| Reflns observed [F > 4σ(F)]       | 6638                                                                                                                              |                |
| Completeness to theta(full)       | 0.998 to 67.684 deg                                                                                                               |                |
| Absorption correction             | Analytical                                                                                                                        |                |
| Max. and min. transmission        | 0.576 and 0.123                                                                                                                   |                |
| Refinement method                 | Full-matrix least-squares on F <sup>2</sup>                                                                                       |                |
| Data / restraints / parameters    | 9170 / 0 / 352                                                                                                                    |                |
| Goodness-of-fit on F <sup>2</sup> | 1.046                                                                                                                             |                |
| Final R indices [F > 4σ(F)]       | R1 = 0.0372, wR2 = 0.1002                                                                                                         |                |
| R indices (all data)              | R1 = 0.0551, wR2 = 0.1193                                                                                                         |                |

|                              |                                |
|------------------------------|--------------------------------|
| Largest diff. peak, hole     | 1.539, -0.640 eÅ <sup>-3</sup> |
| Mean and maximum shift/error | 0.000 and 0.003                |

Outside of the lead complex itself, the structure of **[Pb(K22\_PicAm)]-2PF<sub>6</sub>** was found to be significantly disordered. The solvent could not be identified, and even allowing for some less than ideal thermal ellipsoids only *ca.* 1.88 of the expected 2PF<sub>6</sub> anions could be located, distributed across seven sites ranging from general to 4/*m* special positions. Given that the complex looked to be the only ordered portion of the overall structure, it was decided to use the SQUEEZE routine of PLATON<sup>[4]</sup> to remove everything that was not the complex. This has the downside of losing detail for all the removed electron density (though the extensive disorder meant that detail was already somewhat lacking) whilst having the upside of allowing for a more reliable determination of the geometry of the complex itself, which is the most interesting part of the structure.

Using SQUEEZE like this suggested a total of 3380 electrons per unit cell, equivalent to 211.3 electrons per complex. Accounting for the electron density of the presumed 2PF<sub>6</sub> anions (2 x 69 = 138 electrons) leaves 211.3 – 138 = 73.3 electrons for the solvent. The most recently used solvent was dimethylformamide (C<sub>3</sub>H<sub>7</sub>NO, 40 electrons), and 1.75 dimethylformamide molecules correspond to 70 electrons, so this was used as the solvent present. As a result, the atom list for the asymmetric unit is low by 2(PF<sub>6</sub>) + 1.75(C<sub>3</sub>H<sub>7</sub>NO) = C<sub>5.25</sub>H<sub>12.25</sub>F<sub>12</sub>N<sub>1.75</sub>O<sub>1.75</sub>P<sub>2</sub> (and that for the unit cell low by C<sub>84</sub>H<sub>196</sub>F<sub>192</sub>N<sub>28</sub>O<sub>28</sub>P<sub>32</sub>) compared to what is actually presumed to be present.

The presumed NH<sub>2</sub> hydrogen atoms on N17 and N36 could not be located from Δ*F* maps, and so were added in calculated positions with an N–H distance of 0.90 Å.

### XRD References

- [1] O.V. Dolomanov, L.J. Bourhis, R.J. Gildea, J.A.K. Howard, H. Puschmann, *J. Appl. Cryst.*, 2009, **42**, 339-341.
- [2] SHELXTL v5.1, Bruker AXS, Madison, WI, 1998.
- [3] SHELX-2013, G.M. Sheldrick, *Acta Cryst.*, 2015, **C71**, 3-8.
- [4] A.L. Spek (2003, 2009) PLATON, A Multipurpose Crystallographic Tool, Utrecht University, Utrecht, The Netherlands. See also A.L. Spek, *Acta. Cryst.*, 2015, **C71**, 9-18.

**Table S3.** Bond lengths (Å) and angles (°) for **[Pb(K22\_PicAm)]-2PF<sub>6</sub>** (NL2416).

|             |           |
|-------------|-----------|
| Pb(1)-O(26) | 2.534(4)  |
| Pb(1)-O(35) | 2.604(4)  |
| Pb(1)-N(30) | 2.613(5)  |
| Pb(1)-N(21) | 2.679(5)  |
| Pb(1)-N(10) | 2.890(5)  |
| Pb(1)-O(7)  | 2.891(4)  |
| Pb(1)-O(16) | 2.910(4)  |
| Pb(1)-O(13) | 2.925(4)  |
| Pb(1)-O(4)  | 3.015(4)  |
| Pb(1)-N(1)  | 3.045(5)  |
| N(1)-C(19)  | 1.450(8)  |
| N(1)-C(2)   | 1.466(9)  |
| N(1)-C(18)  | 1.468(9)  |
| C(2)-C(3)   | 1.468(11) |
| C(3)-O(4)   | 1.426(8)  |
| O(4)-C(5)   | 1.414(8)  |

|                   |            |
|-------------------|------------|
| C(5)-C(6)         | 1.508(10)  |
| C(6)-O(7)         | 1.395(8)   |
| O(7)-C(8)         | 1.428(8)   |
| C(8)-C(9)         | 1.501(10)  |
| C(9)-N(10)        | 1.473(9)   |
| N(10)-C(11)       | 1.485(8)   |
| N(10)-C(28)       | 1.486(8)   |
| C(11)-C(12)       | 1.519(11)  |
| C(12)-O(13)       | 1.423(8)   |
| O(13)-C(14)       | 1.425(8)   |
| C(14)-C(15)       | 1.499(11)  |
| C(15)-O(16)       | 1.402(8)   |
| O(16)-C(17)       | 1.425(9)   |
| C(17)-C(18)       | 1.512(11)  |
| C(19)-C(20)       | 1.510(10)  |
| C(20)-N(21)       | 1.340(8)   |
| C(20)-C(25)       | 1.372(10)  |
| N(21)-C(22)       | 1.351(8)   |
| C(22)-C(23)       | 1.389(9)   |
| C(22)-C(26)       | 1.466(9)   |
| C(23)-C(24)       | 1.402(12)  |
| C(24)-C(25)       | 1.346(13)  |
| O(26)-C(26)       | 1.235(7)   |
| C(26)-N(27)       | 1.335(8)   |
| C(28)-C(29)       | 1.502(8)   |
| C(29)-N(30)       | 1.349(7)   |
| C(29)-C(34)       | 1.371(9)   |
| N(30)-C(31)       | 1.332(7)   |
| C(31)-C(32)       | 1.405(9)   |
| C(31)-C(35)       | 1.498(8)   |
| C(32)-C(33)       | 1.354(9)   |
| C(33)-C(34)       | 1.395(10)  |
| O(35)-C(35)       | 1.236(8)   |
| C(35)-N(36)       | 1.341(8)   |
| O(26)-Pb(1)-O(35) | 113.92(13) |
| O(26)-Pb(1)-N(30) | 69.10(15)  |
| O(35)-Pb(1)-N(30) | 61.05(14)  |
| O(26)-Pb(1)-N(21) | 61.45(15)  |
| O(35)-Pb(1)-N(21) | 71.52(14)  |
| N(30)-Pb(1)-N(21) | 82.74(16)  |
| O(26)-Pb(1)-N(10) | 75.61(16)  |
| O(35)-Pb(1)-N(10) | 109.49(14) |
| N(30)-Pb(1)-N(10) | 59.72(14)  |
| N(21)-Pb(1)-N(10) | 131.06(15) |
| O(26)-Pb(1)-O(7)  | 135.31(14) |
| O(35)-Pb(1)-O(7)  | 78.63(14)  |
| N(30)-Pb(1)-O(7)  | 83.22(14)  |
| N(21)-Pb(1)-O(7)  | 150.14(14) |
| N(10)-Pb(1)-O(7)  | 60.05(15)  |
| O(26)-Pb(1)-O(16) | 75.94(15)  |
| O(35)-Pb(1)-O(16) | 132.72(14) |
| N(30)-Pb(1)-O(16) | 144.45(15) |
| N(21)-Pb(1)-O(16) | 74.99(14)  |
| N(10)-Pb(1)-O(16) | 117.63(15) |
| O(7)-Pb(1)-O(16)  | 128.35(13) |
| O(26)-Pb(1)-O(13) | 67.01(12)  |
| O(35)-Pb(1)-O(13) | 170.11(13) |
| N(30)-Pb(1)-O(13) | 111.98(13) |
| N(21)-Pb(1)-O(13) | 115.78(14) |
| N(10)-Pb(1)-O(13) | 60.81(14)  |

|                   |            |
|-------------------|------------|
| O(7)-Pb(1)-O(13)  | 93.91(13)  |
| O(16)-Pb(1)-O(13) | 57.13(14)  |
| O(26)-Pb(1)-O(4)  | 166.53(14) |
| O(35)-Pb(1)-O(4)  | 70.89(13)  |
| N(30)-Pb(1)-O(4)  | 122.48(14) |
| N(21)-Pb(1)-O(4)  | 110.85(14) |
| N(10)-Pb(1)-O(4)  | 115.45(15) |
| O(7)-Pb(1)-O(4)   | 56.99(13)  |
| O(16)-Pb(1)-O(4)  | 91.58(14)  |
| O(13)-Pb(1)-O(4)  | 110.58(11) |
| O(26)-Pb(1)-N(1)  | 110.44(16) |
| O(35)-Pb(1)-N(1)  | 75.22(14)  |
| N(30)-Pb(1)-N(1)  | 128.78(14) |
| N(21)-Pb(1)-N(1)  | 57.87(15)  |
| N(10)-Pb(1)-N(1)  | 170.53(15) |
| O(7)-Pb(1)-N(1)   | 114.24(15) |
| O(16)-Pb(1)-N(1)  | 58.81(15)  |
| O(13)-Pb(1)-N(1)  | 114.08(14) |
| O(4)-Pb(1)-N(1)   | 57.59(14)  |
| C(19)-N(1)-C(2)   | 109.8(6)   |
| C(19)-N(1)-C(18)  | 109.8(6)   |
| C(2)-N(1)-C(18)   | 110.5(6)   |
| C(19)-N(1)-Pb(1)  | 101.7(4)   |
| C(2)-N(1)-Pb(1)   | 113.7(4)   |
| C(18)-N(1)-Pb(1)  | 110.9(4)   |
| N(1)-C(2)-C(3)    | 114.8(6)   |
| O(4)-C(3)-C(2)    | 108.9(6)   |
| C(5)-O(4)-C(3)    | 110.0(6)   |
| C(5)-O(4)-Pb(1)   | 112.0(4)   |
| C(3)-O(4)-Pb(1)   | 113.2(4)   |
| O(4)-C(5)-C(6)    | 109.0(5)   |
| O(7)-C(6)-C(5)    | 108.1(6)   |
| C(6)-O(7)-C(8)    | 110.8(5)   |
| C(6)-O(7)-Pb(1)   | 119.2(4)   |
| C(8)-O(7)-Pb(1)   | 118.5(4)   |
| O(7)-C(8)-C(9)    | 108.5(5)   |
| N(10)-C(9)-C(8)   | 113.4(6)   |
| C(9)-N(10)-C(11)  | 110.3(6)   |
| C(9)-N(10)-C(28)  | 110.2(6)   |
| C(11)-N(10)-C(28) | 108.6(5)   |
| C(9)-N(10)-Pb(1)  | 111.1(4)   |
| C(11)-N(10)-Pb(1) | 112.5(4)   |
| C(28)-N(10)-Pb(1) | 104.0(3)   |
| N(10)-C(11)-C(12) | 114.2(6)   |
| O(13)-C(12)-C(11) | 107.9(5)   |
| C(12)-O(13)-C(14) | 108.5(5)   |
| C(12)-O(13)-Pb(1) | 114.4(4)   |
| C(14)-O(13)-Pb(1) | 113.3(4)   |
| O(13)-C(14)-C(15) | 109.5(5)   |
| O(16)-C(15)-C(14) | 110.0(5)   |
| C(15)-O(16)-C(17) | 110.3(6)   |
| C(15)-O(16)-Pb(1) | 120.4(4)   |
| C(17)-O(16)-Pb(1) | 119.3(4)   |
| O(16)-C(17)-C(18) | 109.1(5)   |
| N(1)-C(18)-C(17)  | 114.1(6)   |
| N(1)-C(19)-C(20)  | 112.3(6)   |
| N(21)-C(20)-C(25) | 122.0(8)   |
| N(21)-C(20)-C(19) | 117.2(6)   |
| C(25)-C(20)-C(19) | 120.8(7)   |
| C(20)-N(21)-C(22) | 119.4(6)   |

|                   |          |
|-------------------|----------|
| C(20)-N(21)-Pb(1) | 123.3(5) |
| C(22)-N(21)-Pb(1) | 116.8(4) |
| N(21)-C(22)-C(23) | 120.7(7) |
| N(21)-C(22)-C(26) | 114.0(5) |
| C(23)-C(22)-C(26) | 125.1(7) |
| C(22)-C(23)-C(24) | 118.7(8) |
| C(25)-C(24)-C(23) | 119.4(8) |
| C(24)-C(25)-C(20) | 119.9(8) |
| C(26)-O(26)-Pb(1) | 121.6(4) |
| O(26)-C(26)-N(27) | 121.4(6) |
| O(26)-C(26)-C(22) | 121.4(6) |
| N(27)-C(26)-C(22) | 117.1(6) |
| N(10)-C(28)-C(29) | 112.0(5) |
| N(30)-C(29)-C(34) | 121.1(6) |
| N(30)-C(29)-C(28) | 116.4(5) |
| C(34)-C(29)-C(28) | 122.4(5) |
| C(31)-N(30)-C(29) | 117.9(5) |
| C(31)-N(30)-Pb(1) | 118.2(4) |
| C(29)-N(30)-Pb(1) | 122.6(4) |
| N(30)-C(31)-C(32) | 123.8(5) |
| N(30)-C(31)-C(35) | 112.9(5) |
| C(32)-C(31)-C(35) | 123.2(5) |
| C(33)-C(32)-C(31) | 117.7(6) |
| C(32)-C(33)-C(34) | 118.8(7) |
| C(29)-C(34)-C(33) | 120.6(6) |
| C(35)-O(35)-Pb(1) | 114.9(4) |
| O(35)-C(35)-N(36) | 122.0(6) |
| O(35)-C(35)-C(31) | 119.7(5) |
| N(36)-C(35)-C(31) | 118.4(6) |

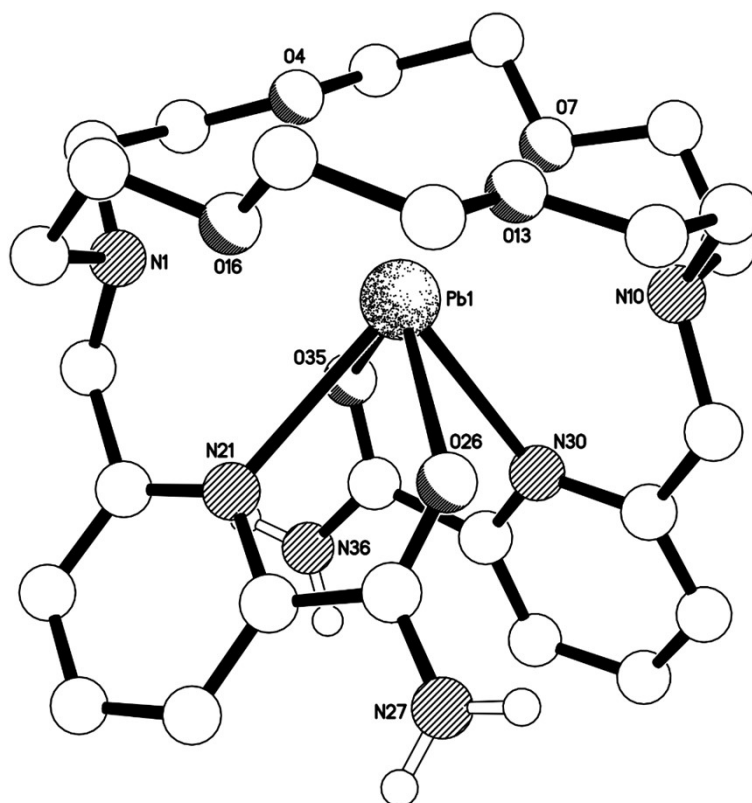

**Figure S41.** The structure of the cationic complex present in the crystal of  $[\text{Pb}(\text{K22\_PicAm})]\text{-}2\text{PF}_6$  (NL2416).

## 11. Density Functional Theory (DFT) Calculations

### Details

Geometry optimizations using density functional theory (DFT) were performed in Gaussian16 (Revision C.01.).<sup>5</sup> Initial geometries for **K22\_PicAm** and **NPK\_PicAm** and respective  $Pb^{2+}$  complexes, were taken from the crystal structure of **macropa** with modification of picolinate arms to the picolinamide arms and addition of a nitrophenyl group in the macrocyclic ring.<sup>6</sup> The hybrid  $\omega$ B97XD functional was employed,<sup>7,8</sup> which includes both dispersion and long-range corrections. Specifically For C, H, N and O atoms the def2tzvp (triple  $\zeta$ ) basis set was utilised.<sup>9</sup> For Pb the Stuttgart-Dresden SDD effective core potential (ECP) and associated basis set was used (keyword=SDD).<sup>10</sup> Geometry optimisations were performed without symmetry constrains (nosymm) and improved numerical integration grid using a pruned grid with 99 radial shells and 590 angular points per shell (int=ultrafine) was used. Additionally, frequency calculations were carried out on optimised structure to confirm, via the absence of imaginary frequencies, that the structures are local minima on the potential energy surface. To simulate the aqueous environment, single point energy corrections using the universal solvation model (SMD)<sup>11</sup> were carried out using water as the solvent. Natural Bond Orbital analysis was carried out in NBO 7.0.<sup>12</sup>

Thermal corrections and solution phase corrections were applied using Paton's *GoodVibes* software,<sup>13</sup> which incorporates Grimme's quasi-harmonic approximation to the vibrational entropy below a cut-off of  $100\text{ cm}^{-1}$  and a frequency scaling factor = 1.0. The entropic terms for the frequencies below the cut-off are obtained from the free-rotor approximation while the standard rigid-rotor harmonic oscillator (RRHO) approximation is retained for those above the cut-off. A dampening function is used to interpolate between these two expressions close to the cut-off frequency. A temperature of 298 K and concentration of 1 M for [L] and 55.5 M (concentration of pure water) for  $H_2O$  was used to correct the gas-phase standard state free energies ( $G_{\text{gas}}^{\circ}$ : 298 K, 1 atm) into solution-phase standard state free energies ( $G_{\text{gas}}^{\circ}$ : 298 K, 1 mol/L) by the relationship with the ideal gas law (1 atm =  $1/24.5$  M at 298 K).

### Methods

For the Gibbs energy of complexation:

$$\text{Equation S4: } \Delta G_{[PbL]}^{\circ} = G_{aq}^{\circ}([PbL]^{2+}) - G_{aq}^{\circ}(Pb^{2+}) - G_{aq}^{\circ}(L)$$

**Table S4.** Free energies in aqueous solution ( $G_{aq}^{\circ}$ , kcal mol<sup>-1</sup>) of DFT optimised structures and the Gibbs free energy changes ( $\Delta G_{aq}^{\circ}$ , kcal mol<sup>-1</sup>) described by **Equation S4**. a:  $G_{aq}^{\circ}(\text{K22\_PicAm}) = -1792.490822$  kcal mol<sup>-1</sup>; b:  $G_{aq}^{\circ}(\text{NPK\_PicAm}) = -2149.398076$  kcal mol<sup>-1</sup>.

|                 | $G_{aq}^{\circ}(\text{PbK22\_PicAm})$ | $G_{aq}^{\circ}(\text{PbNPK\_PicAm})$ | $G_{aq}^{\circ}(\text{Pb}^{2+})$ | $\Delta G_{\text{PbK22\_PicAm}}^{\circ a}$ | $\Delta G_{\text{PbNPK\_PicAm}}^{\circ b}$ |
|-----------------|---------------------------------------|---------------------------------------|----------------------------------|--------------------------------------------|--------------------------------------------|
| Pb- <i>syn</i>  | -1795.734352                          | -2152.648295                          | -3.189201                        | -34.09193646                               | -38.28934416                               |
| Pb- <i>anti</i> | -1795.733969                          | -2152.645044                          |                                  | -33.85160051                               | -36.2493124                                |

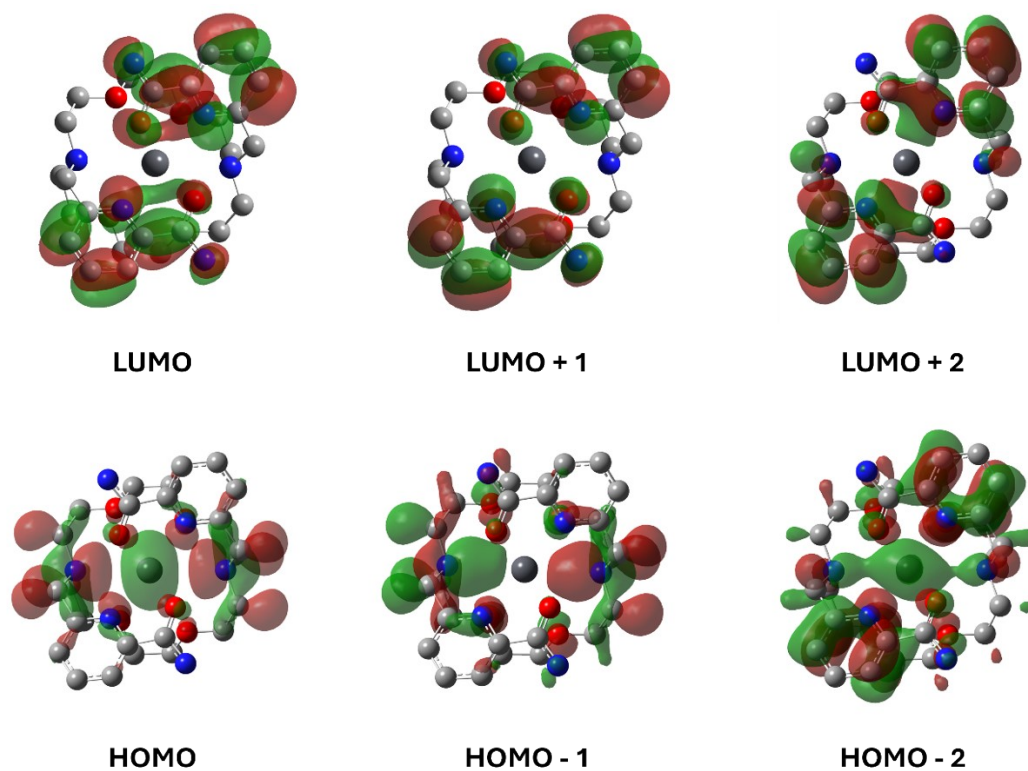

**Figure S42.** Representation of the HOMO, HOMO-1, HOMO-2, LUMO, LUMO+1, and LUMO+2 of *syn*-[Pb(K22\_PicAm)]<sup>2+</sup>.

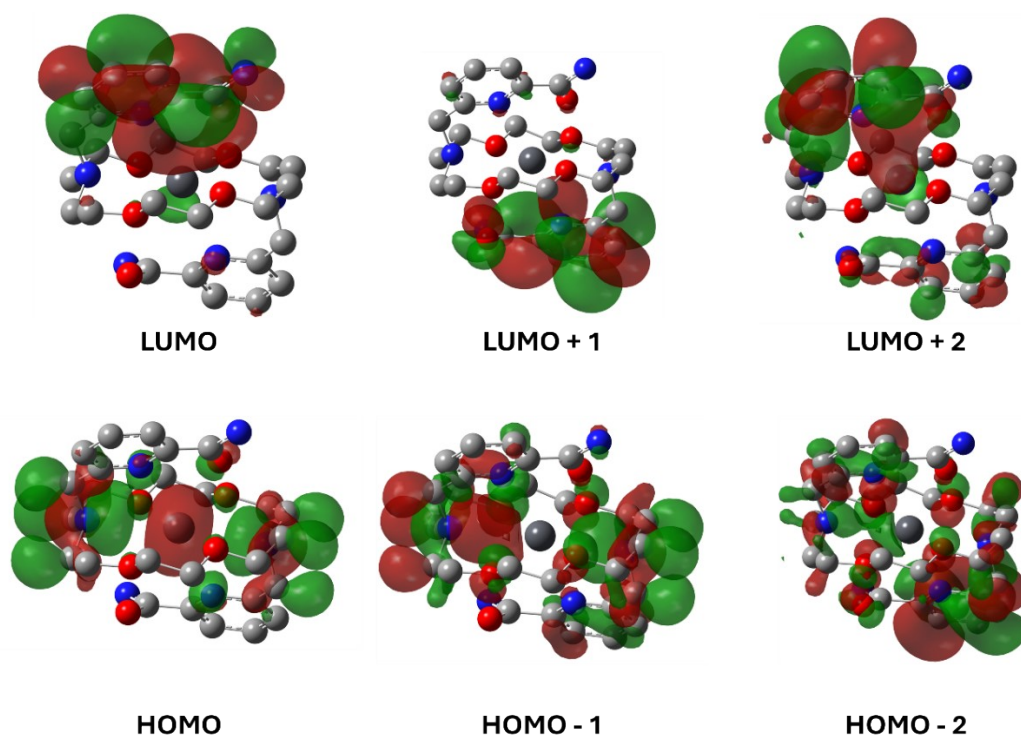

**Figure S43.** Representation of the HOMO, HOMO-1, HOMO-2, LUMO, LUMO+1, and LUMO+2 of *anti*-[Pb(K22\_PicAm)]<sup>2+</sup>.

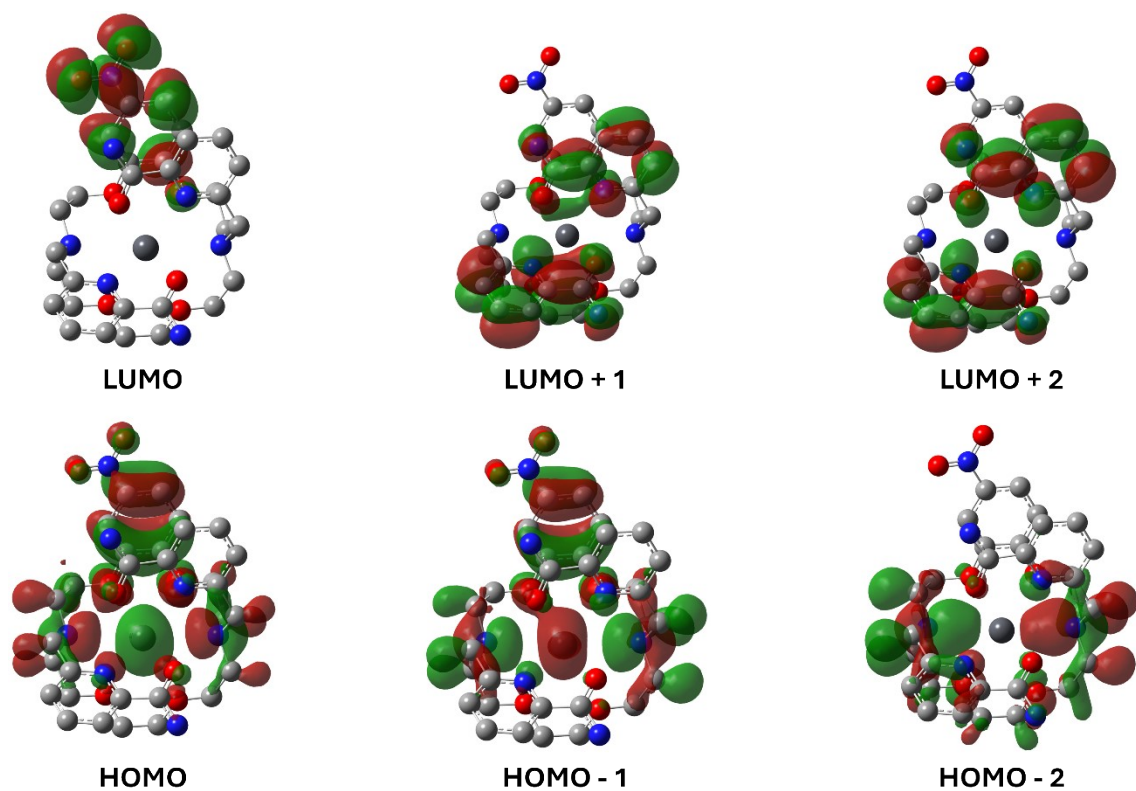

**Figure S44.** Representation of the HOMO, HOMO-1, HOMO-2, LUMO, LUMO+1, and LUMO+2 of *syn*-[Pb(NPK\_PicAm)]<sup>2+</sup>.

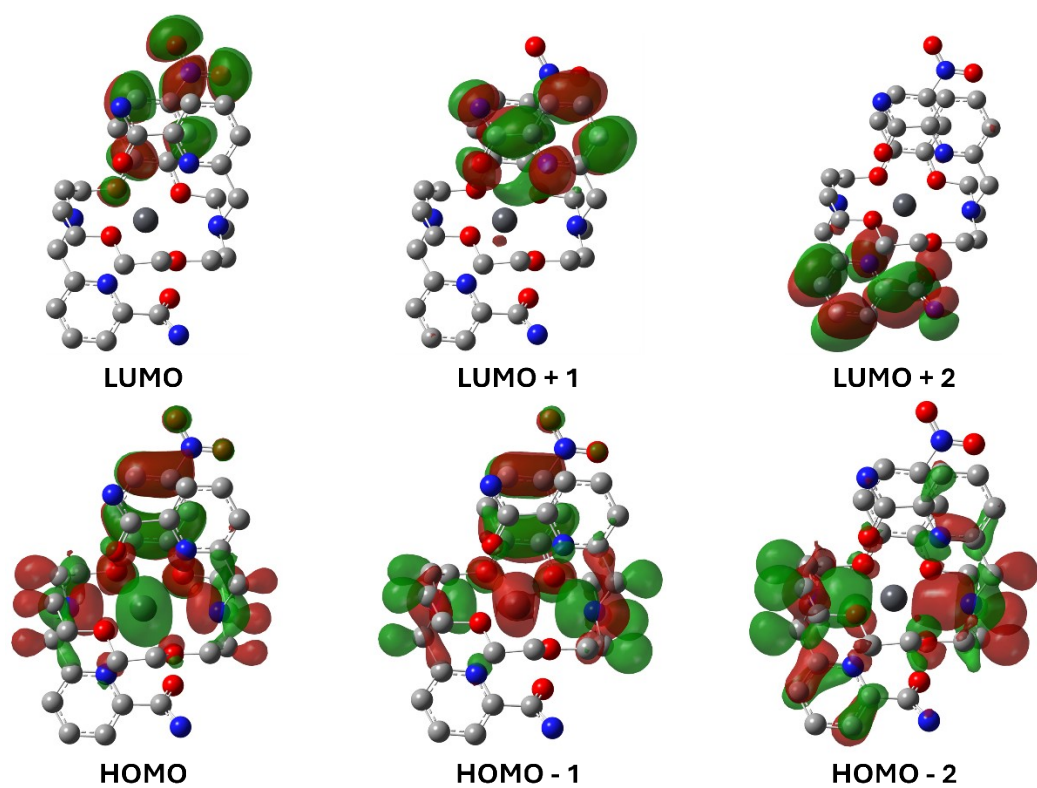

**Figure S45.** Representation of the HOMO, HOMO-1, HOMO-2, LUMO, LUMO+1, and LUMO+2 of *anti*-[Pb(NPK\_PicAm)]<sup>2+</sup>.

**Table S5.** Natural bond orbital analysis of Pb<sup>2+</sup> 6s<sup>2</sup> lone pair for **K22\_PicAm** Pb<sup>2+</sup> complexes.

| [Pb(K22_PicAm)] <sup>2+</sup> | Occupancy | Coefficients/Hybrids    |
|-------------------------------|-----------|-------------------------|
| <i>Syn</i> -conformer         | 1.98196   | s (99.16 %), p (0.59 %) |
| <i>Anti</i> -conformer        | 1.98334   | s (99.85 %), p (0.15 %) |

**Table S6.** Natural bond orbital analysis of Pb<sup>2+</sup> 6s<sup>2</sup> lone pair for **NPK\_PicAm** Pb<sup>2+</sup> complexes.

| [Pb(NPK_PicAm)] <sup>2+</sup> | Occupancy | Coefficients/Hybrids    |
|-------------------------------|-----------|-------------------------|
| <i>Syn</i> -conformer         | 1.98318   | s (99.40 %), p (0.60 %) |
| <i>Anti</i> -conformer        | 1.98376   | s (99.79 %), p (0.20 %) |

**Table S7.** Cartesian coordinates (Å) of the optimized ligand structure of **K22\_PicAm**.

|   |          |           |           |
|---|----------|-----------|-----------|
| C | 2.979278 | 2.579560  | 20.500602 |
| C | 2.928686 | 1.069105  | 20.447513 |
| C | 2.526068 | 0.363843  | 21.572053 |
| H | 2.250059 | 0.905318  | 22.465578 |
| C | 2.497995 | -1.015330 | 21.492050 |
| H | 2.192051 | -1.610576 | 22.343130 |
| C | 2.872825 | -1.626568 | 20.305874 |
| H | 2.867750 | -2.704929 | 20.210166 |
| C | 3.262947 | -0.839423 | 19.229908 |
| C | 3.681093 | -1.440181 | 17.910860 |
| H | 3.489882 | -2.526659 | 17.922747 |
| H | 3.038159 | -1.015557 | 17.139262 |
| C | 5.310509 | -1.197569 | 16.144926 |
| H | 4.800906 | -2.053501 | 15.673912 |
| H | 6.377305 | -1.320514 | 15.976304 |
| C | 4.873336 | 0.085706  | 15.463421 |
| H | 3.803650 | 0.278668  | 15.631509 |
| H | 5.430723 | 0.930217  | 15.889017 |
| C | 4.584868 | 1.002186  | 13.323252 |
| H | 4.796416 | 1.977810  | 13.781420 |
| H | 3.492950 | 0.891247  | 13.252763 |
| C | 5.186932 | 0.973638  | 11.942253 |
| H | 5.195373 | -0.060221 | 11.572583 |
| H | 4.571977 | 1.575686  | 11.257483 |
| C | 7.229856 | 1.324236  | 10.825204 |
| H | 6.715562 | 1.825788  | 9.991643  |
| H | 7.324446 | 0.259006  | 10.576616 |
| C | 5.982755 | -1.927146 | 18.380614 |
| H | 6.081194 | -2.958990 | 18.002785 |
| H | 5.565757 | -1.996991 | 19.388042 |
| N | 3.432577 | 3.149821  | 19.368028 |
| H | 3.512266 | 4.148218  | 19.321137 |
| H | 3.707494 | 2.559824  | 18.601266 |
| N | 3.282964 | 0.487781  | 19.308946 |
| N | 5.062302 | -1.140299 | 17.578682 |
| O | 2.639176 | 3.192597  | 21.492144 |

|   |           |           |           |
|---|-----------|-----------|-----------|
| O | 5.132471  | -0.037108 | 14.087975 |
| O | 6.489472  | 1.489424  | 12.007557 |
| C | 11.614993 | -2.579543 | 8.857761  |
| C | 11.665586 | -1.069088 | 8.910858  |
| C | 12.068209 | -0.363821 | 7.786323  |
| H | 12.344223 | -0.905290 | 6.892797  |
| C | 12.096278 | 1.015353  | 7.866332  |
| H | 12.402226 | 1.610603  | 7.015257  |
| C | 11.721440 | 1.626585  | 9.052508  |
| H | 11.726514 | 2.704945  | 9.148221  |
| C | 11.331314 | 0.839434  | 10.128469 |
| C | 10.913163 | 1.440186  | 11.447518 |
| H | 11.104371 | 2.526665  | 11.435635 |
| H | 11.556097 | 1.015562  | 12.219116 |
| C | 9.283747  | 1.197564  | 13.213450 |
| H | 9.793348  | 2.053495  | 13.684466 |
| H | 8.216950  | 1.320506  | 13.382071 |
| C | 9.720921  | -0.085713 | 13.894953 |
| H | 10.790607 | -0.278674 | 13.726865 |
| H | 9.163534  | -0.930223 | 13.469356 |
| C | 10.009387 | -1.002197 | 16.035121 |
| H | 9.797836  | -1.977820 | 15.576952 |
| H | 11.101305 | -0.891260 | 16.105609 |
| C | 9.407325  | -0.973650 | 17.416120 |
| H | 9.398886  | 0.060209  | 17.785791 |
| H | 10.022278 | -1.575700 | 18.100889 |
| C | 7.364401  | -1.324244 | 18.533171 |
| H | 7.878695  | -1.825797 | 19.366732 |
| H | 7.269814  | -0.259013 | 18.781759 |
| C | 8.611501  | 1.927143  | 10.977762 |
| H | 8.513058  | 2.958986  | 11.355592 |
| H | 9.028499  | 1.996989  | 9.970335  |
| N | 11.161685 | -3.149809 | 9.990328  |
| H | 11.081996 | -4.148207 | 10.037214 |
| H | 10.886762 | -2.559816 | 10.757091 |
| N | 11.311300 | -0.487769 | 10.049425 |
| N | 9.531955  | 1.140298  | 11.779693 |
| O | 11.955103 | -3.192574 | 7.866219  |
| O | 9.461784  | 0.037098  | 15.270399 |
| O | 8.104782  | -1.489432 | 17.350818 |

**Table S8.** Cartesian coordinates (Å) of the optimized ligand structure of **NPK\_PicAm**.

|   |          |           |           |
|---|----------|-----------|-----------|
| C | 4.463300 | 2.141139  | 21.594143 |
| C | 3.550868 | 1.075362  | 21.049356 |
| C | 2.454817 | 0.663445  | 21.781542 |
| H | 2.234909 | 1.109786  | 22.740624 |
| C | 1.663245 | -0.344399 | 21.248536 |
| H | 0.798048 | -0.705678 | 21.789221 |
| C | 2.002416 | -0.887159 | 20.026719 |
| H | 1.415500 | -1.684769 | 19.589662 |
| C | 3.120264 | -0.399642 | 19.349237 |
| C | 3.455162 | -0.956402 | 17.986103 |
| H | 3.162805 | -2.017936 | 17.967441 |

|   |           |           |           |
|---|-----------|-----------|-----------|
| H | 2.802135  | -0.450555 | 17.271707 |
| C | 5.001991  | -1.077697 | 16.154102 |
| H | 4.592227  | -2.070354 | 15.907042 |
| H | 6.068344  | -1.105022 | 15.938167 |
| C | 4.382429  | -0.035122 | 15.241622 |
| H | 3.287702  | -0.085419 | 15.247294 |
| H | 4.676652  | 0.971234  | 15.563424 |
| C | 4.232918  | 0.549755  | 12.966703 |
| H | 4.229035  | 1.591193  | 13.310992 |
| H | 3.192807  | 0.237862  | 12.814090 |
| C | 4.980967  | 0.449621  | 11.666494 |
| H | 5.106159  | -0.603864 | 11.386979 |
| H | 4.402744  | 0.944487  | 10.876265 |
| C | 7.105409  | 0.860703  | 10.715966 |
| H | 6.692599  | 1.366222  | 9.834108  |
| H | 7.172047  | -0.209465 | 10.486839 |
| C | 5.734855  | -1.579232 | 18.400937 |
| H | 5.879332  | -2.581352 | 17.973569 |
| H | 5.278506  | -1.725181 | 19.379988 |
| N | 5.544155  | 2.394722  | 20.857593 |
| H | 6.204502  | 3.091351  | 21.159305 |
| H | 5.691057  | 1.884399  | 20.001434 |
| N | 3.871363  | 0.565326  | 19.859713 |
| N | 4.836120  | -0.774234 | 17.572695 |
| O | 4.210847  | 2.718570  | 22.652889 |
| O | 4.855970  | -0.277191 | 13.930367 |
| O | 6.241251  | 1.066720  | 11.817870 |
| C | 12.721553 | -1.946739 | 8.573255  |
| C | 12.359231 | -0.527691 | 8.923572  |
| C | 12.670446 | 0.494074  | 8.042418  |
| H | 13.169897 | 0.277296  | 7.109263  |
| C | 12.324101 | 1.786438  | 8.396981  |
| H | 12.547561 | 2.615841  | 7.738715  |
| C | 11.685391 | 1.999139  | 9.604720  |
| H | 11.394798 | 2.994564  | 9.913754  |
| C | 11.409097 | 0.914300  | 10.429970 |
| C | 10.727789 | 1.101585  | 11.758663 |
| H | 10.734033 | 2.169921  | 12.018814 |
| H | 11.322266 | 0.584805  | 12.512261 |
| C | 8.917752  | 0.458570  | 13.178157 |
| H | 9.210013  | 1.344406  | 13.762192 |
| H | 7.832908  | 0.407473  | 13.197936 |
| C | 9.440379  | -0.805711 | 13.838260 |
| H | 10.526770 | -0.899387 | 13.800367 |
| H | 9.010471  | -1.680668 | 13.354425 |
| C | 7.076578  | -0.940232 | 18.667502 |
| H | 7.607843  | -1.503680 | 19.440628 |
| H | 6.938346  | 0.088332  | 19.011833 |
| C | 8.482599  | 1.423359  | 10.996714 |
| H | 8.376499  | 2.420964  | 11.452346 |
| H | 8.959973  | 1.571255  | 10.026991 |
| N | 12.361975 | -2.866810 | 9.466132  |
| H | 12.569533 | -3.836890 | 9.297287  |
| H | 11.880475 | -2.585790 | 10.304165 |
| N | 11.748198 | -0.326501 | 10.088703 |

|   |           |           |           |
|---|-----------|-----------|-----------|
| N | 9.363942  | 0.569336  | 11.793372 |
| O | 13.309887 | -2.212108 | 7.523927  |
| O | 7.845737  | -0.948052 | 17.467947 |
| C | 9.602508  | -0.173206 | 16.147287 |
| C | 8.982680  | -0.230413 | 17.418808 |
| C | 10.762272 | 0.567838  | 15.976679 |
| C | 9.549116  | 0.425090  | 18.487614 |
| C | 11.330191 | 1.235841  | 17.049216 |
| H | 11.230190 | 0.639936  | 15.005734 |
| C | 10.721170 | 1.151443  | 18.283214 |
| H | 9.104486  | 0.385588  | 19.469299 |
| H | 12.232635 | 1.812525  | 16.914760 |
| O | 8.983764  | -0.877969 | 15.189718 |
| N | 11.309339 | 1.843823  | 19.410739 |
| O | 12.333327 | 2.483618  | 19.236791 |
| O | 10.760128 | 1.763207  | 20.497180 |

**Table S9.** Cartesian coordinates (Å) of the optimized complex structure of *syn*-[Pb(K22\_PicAm)]<sup>2+</sup>.

|    |          |           |          |
|----|----------|-----------|----------|
| Pb | 4.918596 | 8.694108  | 5.032714 |
| O  | 7.435448 | 10.187059 | 5.729931 |
| N  | 3.432308 | 7.693166  | 7.424520 |
| O  | 6.258446 | 8.566469  | 7.680709 |
| N  | 6.424880 | 10.296344 | 2.976596 |
| O  | 2.476704 | 10.123111 | 6.071488 |
| N  | 7.090114 | 7.524880  | 3.778620 |
| O  | 3.628034 | 11.032057 | 3.684886 |
| N  | 2.625755 | 7.223308  | 4.637838 |
| C  | 5.454307 | 11.016297 | 2.137089 |
| H  | 5.970847 | 11.667779 | 1.416910 |
| H  | 4.899223 | 10.270348 | 1.570182 |
| C  | 4.448408 | 11.858573 | 2.884944 |
| H  | 4.921168 | 12.627534 | 3.506090 |
| H  | 3.835129 | 12.382500 | 2.142206 |
| C  | 2.627570 | 11.765666 | 4.362174 |
| H  | 2.029268 | 12.340391 | 3.645608 |
| H  | 3.086977 | 12.468482 | 5.067204 |
| C  | 1.725586 | 10.816976 | 5.098650 |
| H  | 0.924772 | 11.394448 | 5.573880 |
| H  | 1.264754 | 10.103573 | 4.401814 |
| C  | 1.668723 | 9.437010  | 7.001505 |
| H  | 0.988504 | 8.752918  | 6.481531 |
| H  | 1.046908 | 10.150576 | 7.554449 |
| C  | 2.553212 | 8.720677  | 7.993259 |
| H  | 3.175291 | 9.476683  | 8.469848 |
| H  | 1.912113 | 8.288245  | 8.775979 |
| C  | 4.408754 | 7.251400  | 8.433904 |
| H  | 4.925968 | 6.382467  | 8.029460 |
| H  | 3.898476 | 6.937889  | 9.356347 |
| C  | 5.459190 | 8.269703  | 8.806957 |
| H  | 5.028873 | 9.192110  | 9.212848 |
| H  | 6.079798 | 7.832450  | 9.597883 |
| C  | 7.308686 | 9.460924  | 7.988235 |
| H  | 7.909817 | 9.068108  | 8.816404 |

|   |           |           |          |
|---|-----------|-----------|----------|
| H | 6.900507  | 10.432579 | 8.290557 |
| C | 8.190505  | 9.626708  | 6.783683 |
| H | 9.023755  | 10.286428 | 7.049899 |
| H | 8.605916  | 8.658633  | 6.473323 |
| C | 8.238434  | 10.675905 | 4.678920 |
| H | 8.893690  | 9.882944  | 4.302283 |
| H | 8.886068  | 11.480428 | 5.046348 |
| C | 7.350768  | 11.247570 | 3.599762 |
| H | 6.764815  | 12.043054 | 4.057603 |
| H | 7.993335  | 11.715761 | 2.838927 |
| C | 7.123063  | 9.324265  | 2.138772 |
| H | 7.861694  | 9.818367  | 1.492745 |
| H | 6.381387  | 8.863172  | 1.483818 |
| C | 7.791029  | 8.179619  | 2.860138 |
| C | 9.069863  | 7.767501  | 2.493193 |
| H | 9.619912  | 8.316963  | 1.740978 |
| C | 9.626121  | 6.666053  | 3.108188 |
| H | 10.626403 | 6.339463  | 2.856490 |
| C | 8.878955  | 5.976269  | 4.050911 |
| H | 9.308317  | 5.113748  | 4.540399 |
| C | 7.604852  | 6.431324  | 4.341429 |
| C | 2.681345  | 6.524495  | 6.975279 |
| H | 1.950752  | 6.209685  | 7.733142 |
| H | 3.392029  | 5.704150  | 6.857674 |
| C | 1.981544  | 6.644745  | 5.644048 |
| C | 0.728652  | 6.062147  | 5.465003 |
| H | 0.223270  | 5.599342  | 6.302104 |
| C | 0.149892  | 6.077895  | 4.214558 |
| H | -0.818895 | 5.625724  | 4.048573 |
| C | 0.835924  | 6.672802  | 3.166168 |
| H | 0.405503  | 6.656388  | 2.175160 |
| C | 2.071974  | 7.237292  | 3.424142 |
| C | 2.940672  | 7.853054  | 2.355855 |
| C | 6.661711  | 5.719481  | 5.278493 |
| N | 7.010671  | 4.508049  | 5.715392 |
| H | 7.819445  | 4.016293  | 5.384321 |
| H | 6.371553  | 4.011172  | 6.312397 |
| N | 2.394467  | 8.088847  | 1.161212 |
| H | 1.429233  | 7.916720  | 0.951716 |
| H | 2.978649  | 8.451723  | 0.427456 |
| O | 4.118950  | 8.108262  | 2.585799 |
| O | 5.597839  | 6.235580  | 5.610730 |

**Table S10.** Cartesian coordinates (Å) of the optimized complex structure of *anti*-[Pb(K22\_PicAm)]<sup>2+</sup>.

|   |          |           |           |
|---|----------|-----------|-----------|
| C | 6.210078 | 2.628155  | 16.989725 |
| C | 5.552868 | 1.477188  | 17.702504 |
| C | 5.196369 | 1.521107  | 19.039203 |
| H | 5.425299 | 2.375795  | 19.660647 |
| C | 4.556784 | 0.417971  | 19.584594 |
| H | 4.268241 | 0.410505  | 20.627378 |
| C | 4.292570 | -0.665425 | 18.772978 |
| H | 3.781433 | -1.536367 | 19.161704 |
| C | 4.703853 | -0.632781 | 17.442677 |

|   |           |           |           |
|---|-----------|-----------|-----------|
| C | 4.357308  | -1.762163 | 16.506538 |
| H | 4.013956  | -2.626655 | 17.089635 |
| H | 3.492522  | -1.420531 | 15.935678 |
| C | 4.836125  | -2.693138 | 14.337375 |
| H | 4.074274  | -3.455083 | 14.554944 |
| H | 5.637876  | -3.179430 | 13.785125 |
| C | 4.211185  | -1.652234 | 13.436525 |
| H | 3.744463  | -2.167327 | 12.589885 |
| H | 3.423295  | -1.083023 | 13.943871 |
| C | 4.661319  | 0.235729  | 12.101694 |
| H | 3.970996  | 0.876533  | 12.662382 |
| H | 4.107321  | -0.235120 | 11.282278 |
| C | 5.776074  | 1.061284  | 11.521538 |
| H | 6.464421  | 0.433023  | 10.941490 |
| H | 5.339070  | 1.806250  | 10.848583 |
| C | 7.293843  | 2.771720  | 12.120452 |
| H | 6.657290  | 3.607123  | 11.810957 |
| H | 7.868527  | 2.455440  | 11.243205 |
| C | 6.312208  | -3.144188 | 16.178892 |
| H | 6.966417  | -3.519045 | 15.394334 |
| H | 5.741436  | -3.994612 | 16.579688 |
| N | 6.066527  | 3.844937  | 17.524580 |
| H | 6.475296  | 4.632144  | 17.050107 |
| H | 5.443945  | 4.029506  | 18.289672 |
| N | 5.337774  | 0.413174  | 16.929318 |
| N | 5.413116  | -2.152078 | 15.575771 |
| O | 6.841896  | 2.442137  | 15.956451 |
| O | 5.200560  | -0.756759 | 12.956655 |
| O | 6.481345  | 1.700001  | 12.569230 |
| C | 8.396584  | -2.610303 | 12.474940 |
| C | 8.903352  | -1.447811 | 11.665130 |
| C | 9.103703  | -1.505925 | 10.296779 |
| H | 8.846245  | -2.384602 | 9.721541  |
| C | 9.621939  | -0.386471 | 9.662716  |
| H | 9.786158  | -0.388178 | 8.593237  |
| C | 9.931406  | 0.724187  | 10.420605 |
| H | 10.357205 | 1.606390  | 9.960671  |
| C | 9.681283  | 0.702122  | 11.790456 |
| C | 10.091016 | 1.856882  | 12.669266 |
| H | 10.331790 | 2.725866  | 12.043804 |
| H | 11.029857 | 1.555923  | 13.137397 |
| C | 9.823643  | 2.680632  | 14.922015 |
| H | 10.592553 | 3.427293  | 14.679098 |
| H | 9.085754  | 3.163781  | 15.559911 |
| C | 10.475308 | 1.572938  | 15.718833 |
| H | 11.047580 | 2.025217  | 16.535689 |
| H | 11.174956 | 0.982907  | 15.114750 |
| C | 10.019537 | -0.305167 | 17.080366 |
| H | 10.613476 | -1.000068 | 16.475656 |
| H | 10.669510 | 0.131255  | 17.846231 |
| C | 8.893683  | -1.036951 | 17.758588 |
| H | 8.305844  | -0.351727 | 18.381851 |
| H | 9.319797  | -1.812191 | 18.403585 |
| C | 7.184081  | -2.607919 | 17.290733 |
| H | 7.770103  | -3.438537 | 17.698044 |

|    |          |           |           |
|----|----------|-----------|-----------|
| H  | 6.597117 | -2.185579 | 18.113367 |
| C  | 8.193267 | 3.237957  | 13.240818 |
| H  | 7.570267 | 3.531286  | 14.083820 |
| H  | 8.729499 | 4.131448  | 12.888233 |
| N  | 9.155527 | -0.358213 | 12.388900 |
| N  | 9.133853 | 2.215257  | 13.712443 |
| O  | 9.482403 | 0.715964  | 16.259124 |
| O  | 8.062834 | -1.623270 | 16.773621 |
| Pb | 7.290262 | 0.026139  | 14.684862 |
| O  | 7.876793 | -2.427936 | 13.569433 |
| N  | 8.549617 | -3.833100 | 11.955948 |
| H  | 8.256861 | -4.627546 | 12.499353 |
| H  | 9.098806 | -4.004551 | 11.133531 |

**Table S11.** Cartesian coordinates (Å) of the optimized complex structure of *syn*-[Pb(NPK\_PicAm)]<sup>2+</sup>.

|    |          |           |          |
|----|----------|-----------|----------|
| Pb | 5.143018 | 8.684554  | 5.049150 |
| O  | 7.668822 | 10.042148 | 5.899583 |
| N  | 3.472825 | 7.750750  | 7.345875 |
| O  | 6.412676 | 8.230797  | 7.661868 |
| N  | 6.577604 | 10.449692 | 3.183566 |
| O  | 2.421415 | 10.262115 | 6.059650 |
| N  | 7.222283 | 7.654235  | 3.718342 |
| O  | 3.872362 | 11.324295 | 4.250438 |
| N  | 2.702282 | 7.413083  | 4.531001 |
| C  | 5.595148 | 11.304735 | 2.498995 |
| H  | 6.100581 | 12.009438 | 1.822271 |
| H  | 4.962473 | 10.661409 | 1.886252 |
| C  | 4.708936 | 12.124778 | 3.412007 |
| H  | 5.283831 | 12.739205 | 4.101357 |
| H  | 4.103491 | 12.799849 | 2.806229 |
| C  | 1.748244 | 9.578456  | 7.116881 |
| H  | 1.017550 | 8.879056  | 6.715769 |
| H  | 1.214705 | 10.310489 | 7.726328 |
| C  | 2.769987 | 8.876021  | 7.974786 |
| H  | 3.507891 | 9.612261  | 8.292176 |
| H  | 2.239297 | 8.531528  | 8.875207 |
| C  | 4.386890 | 7.137541  | 8.322574 |
| H  | 4.791208 | 6.228170  | 7.877426 |
| H  | 3.835165 | 6.843666  | 9.227811 |
| C  | 5.550947 | 7.992534  | 8.759123 |
| H  | 5.233503 | 8.945957  | 9.193857 |
| H  | 6.092701 | 7.442640  | 9.537448 |
| C  | 7.550871 | 8.987030  | 8.025545 |
| H  | 8.145074 | 8.438213  | 8.765165 |
| H  | 7.238541 | 9.938430  | 8.472080 |
| C  | 8.396726 | 9.242904  | 6.812266 |
| H  | 9.308159 | 9.763045  | 7.127225 |
| H  | 8.686767 | 8.298681  | 6.333672 |
| C  | 8.469164 | 10.534973 | 4.842877 |
| H  | 9.028951 | 9.716274  | 4.381249 |
| H  | 9.203934 | 11.245883 | 5.238213 |
| C  | 7.594826 | 11.268912 | 3.854624 |
| H  | 7.095644 | 12.066085 | 4.402138 |

|   |           |           |          |
|---|-----------|-----------|----------|
| H | 8.248480  | 11.745826 | 3.110486 |
| C | 7.187311  | 9.558765  | 2.196473 |
| H | 7.917870  | 10.099354 | 1.581901 |
| H | 6.399868  | 9.208666  | 1.527384 |
| C | 7.846169  | 8.324336  | 2.757303 |
| C | 9.048182  | 7.865497  | 2.225788 |
| H | 9.535780  | 8.426804  | 1.440367 |
| C | 9.604036  | 6.705391  | 2.720865 |
| H | 10.538692 | 6.330962  | 2.325345 |
| C | 8.952066  | 6.019711  | 3.735549 |
| H | 9.369312  | 5.102183  | 4.124671 |
| C | 7.757465  | 6.532510  | 4.202272 |
| C | 2.552707  | 6.719529  | 6.870370 |
| H | 1.746587  | 6.544470  | 7.594423 |
| H | 3.112090  | 5.784529  | 6.795650 |
| C | 1.940543  | 6.938878  | 5.507757 |
| C | 0.620180  | 6.557816  | 5.277184 |
| H | 0.020589  | 6.183533  | 6.096002 |
| C | 0.098844  | 6.668538  | 4.007221 |
| H | -0.922795 | 6.377367  | 3.802992 |
| C | 0.900331  | 7.164848  | 2.990401 |
| H | 0.503439  | 7.249076  | 1.989273 |
| C | 2.195306  | 7.533018  | 3.301161 |
| C | 3.163923  | 8.068497  | 2.282838 |
| C | 6.917054  | 5.851693  | 5.247829 |
| N | 7.485408  | 4.931167  | 6.010993 |
| H | 8.461061  | 4.697896  | 5.944517 |
| H | 6.923999  | 4.467348  | 6.707976 |
| N | 2.723797  | 8.317198  | 1.055318 |
| H | 1.748242  | 8.293944  | 0.813335 |
| H | 3.367686  | 8.718461  | 0.392022 |
| O | 4.348735  | 8.241084  | 2.586827 |
| O | 5.722660  | 6.153664  | 5.367054 |
| C | 1.783543  | 10.516698 | 4.910176 |
| C | 2.597331  | 11.057841 | 3.885892 |
| C | 0.440809  | 10.270361 | 4.669988 |
| C | 2.078115  | 11.237708 | 2.626686 |
| C | -0.090846 | 10.475999 | 3.408211 |
| H | -0.200197 | 9.900811  | 5.455749 |
| C | 0.736879  | 10.933394 | 2.405748 |
| H | 2.690206  | 11.585804 | 1.809747 |
| H | -1.130521 | 10.261636 | 3.212806 |
| N | 0.209254  | 11.080088 | 1.065492 |
| O | -0.980056 | 10.885864 | 0.879674 |
| O | 0.977067  | 11.381724 | 0.166989 |

**Table S12.** Cartesian coordinates (Å) of the optimized complex structure of *anti*-[Pb(NPK\_PicAm)]<sup>2+</sup>.

|   |          |          |           |
|---|----------|----------|-----------|
| C | 6.750043 | 2.754534 | 16.770292 |
| C | 5.775920 | 1.748060 | 17.311624 |
| C | 5.090361 | 1.916753 | 18.499964 |
| H | 5.236634 | 2.781539 | 19.130752 |
| C | 4.214865 | 0.917321 | 18.897667 |
| H | 3.671657 | 1.007726 | 19.828720 |

|   |           |           |           |
|---|-----------|-----------|-----------|
| C | 4.064223  | -0.196165 | 18.100495 |
| H | 3.400435  | -1.001624 | 18.384643 |
| C | 4.798887  | -0.290318 | 16.920911 |
| C | 4.613749  | -1.469932 | 16.002801 |
| H | 4.122711  | -2.282461 | 16.551264 |
| H | 3.908534  | -1.149001 | 15.234861 |
| C | 5.535626  | -2.501946 | 14.029532 |
| H | 4.697619  | -3.210244 | 14.083199 |
| H | 6.409026  | -3.062532 | 13.701174 |
| C | 5.197667  | -1.468719 | 12.980521 |
| H | 4.908129  | -1.989660 | 12.062343 |
| H | 4.359308  | -0.833521 | 13.283993 |
| C | 6.033564  | 0.405235  | 11.802410 |
| H | 5.286713  | 1.072979  | 12.245058 |
| H | 5.626558  | -0.009290 | 10.874968 |
| C | 7.291501  | 1.159198  | 11.477367 |
| H | 8.039952  | 0.492383  | 11.033619 |
| H | 7.048195  | 1.942257  | 10.752889 |
| C | 8.927164  | 2.599545  | 12.398755 |
| H | 8.560616  | 3.539823  | 11.975459 |
| H | 9.576818  | 2.134511  | 11.653907 |
| C | 6.523158  | -2.958626 | 16.164408 |
| H | 7.405060  | -3.288503 | 15.614125 |
| H | 5.876053  | -3.835148 | 16.312529 |
| N | 6.791842  | 3.960940  | 17.321368 |
| H | 7.446040  | 4.633296  | 16.953609 |
| H | 6.162447  | 4.255176  | 18.047371 |
| N | 5.634560  | 0.666480  | 16.542772 |
| N | 5.834353  | -1.944570 | 15.354718 |
| O | 7.483691  | 2.458808  | 15.821445 |
| O | 6.326882  | -0.647318 | 12.710018 |
| O | 7.819823  | 1.744014  | 12.659428 |
| C | 8.806487  | -2.830565 | 12.396450 |
| C | 9.693389  | -1.710258 | 11.920259 |
| C | 10.189225 | -1.683358 | 10.628202 |
| H | 9.914181  | -2.440682 | 9.907453  |
| C | 11.078267 | -0.676425 | 10.287465 |
| H | 11.493811 | -0.627224 | 9.289669  |
| C | 11.427431 | 0.255179  | 11.242043 |
| H | 12.115853 | 1.057659  | 11.013842 |
| C | 10.872899 | 0.162692  | 12.515351 |
| C | 11.297559 | 1.122894  | 13.596751 |
| H | 11.931739 | 1.902003  | 13.157411 |
| H | 11.931989 | 0.549918  | 14.272895 |
| C | 10.689901 | 2.128975  | 15.702676 |
| H | 11.612945 | 2.720397  | 15.624911 |
| H | 9.930733  | 2.764915  | 16.157226 |
| C | 10.973601 | 0.967852  | 16.629898 |
| H | 11.441816 | 1.332584  | 17.542797 |
| H | 11.649455 | 0.241426  | 16.183020 |
| C | 6.943146  | -2.493459 | 17.538604 |
| H | 7.348780  | -3.339378 | 18.096561 |
| H | 6.092300  | -2.101751 | 18.093138 |
| C | 9.669966  | 2.909484  | 13.677054 |
| H | 8.992280  | 3.415312  | 14.361084 |

|    |           |           |           |
|----|-----------|-----------|-----------|
| H  | 10.477223 | 3.610779  | 13.423631 |
| N  | 10.026581 | -0.807260 | 12.844407 |
| N  | 10.211678 | 1.731501  | 14.369346 |
| O  | 7.962233  | -1.500042 | 17.406483 |
| C  | 9.110151  | 0.416876  | 18.080593 |
| C  | 8.126127  | -0.559812 | 18.364448 |
| C  | 9.281800  | 1.497366  | 18.928856 |
| C  | 7.402319  | -0.477283 | 19.530043 |
| C  | 8.524679  | 1.603938  | 20.083892 |
| H  | 9.991870  | 2.274953  | 18.690469 |
| C  | 7.610876  | 0.612817  | 20.369391 |
| H  | 6.669917  | -1.221482 | 19.796670 |
| H  | 8.647384  | 2.451892  | 20.740159 |
| O  | 9.796876  | 0.208061  | 16.942223 |
| N  | 6.798806  | 0.721848  | 21.565623 |
| O  | 6.988605  | 1.662875  | 22.316718 |
| O  | 5.947846  | -0.126587 | 21.770543 |
| Pb | 7.872481  | 0.070945  | 14.786429 |
| N  | 7.993744  | -3.378061 | 11.490145 |
| H  | 7.386556  | -4.130182 | 11.773888 |
| H  | 7.867702  | -2.975886 | 10.577367 |
| O  | 8.873826  | -3.228270 | 13.557715 |

## 12. References

- 1 A. Roca-Sabio, M. Mato-Iglesias, D. Esteban-Gómez, É. Tóth, A. de Blas, C. Platas-Iglesias and T. Rodríguez-Blas, Macrocyclic Receptor Exhibiting Unprecedented Selectivity for Light Lanthanides, *J. Am. Chem. Soc.*, 2009, **131**, 3331–3341.
- 2 K. J. Kadassery and J. J. Wilson, WO 2022/251496 A1, 2022.
- 3 M. Regueiro-Figueroa, J. L. Barriada, A. Pallier, D. Esteban-Gómez, A. de Blas, T. Rodríguez-Blas, É. Tóth and C. Platas-Iglesias, Stabilizing Divalent Europium in Aqueous Solution Using Size-Discrimination and Electrostatic Effects, *Inorg. Chem.*, 2015, **54**, 4940–4952.
- 4 P. Gans, A. Sabatini and A. Vacca, Investigation of equilibria in solution. Determination of equilibrium constants with the HYPERQUAD suite of programs, *Talanta*, 1996, **43**, 1739–1753.
- 5 Gaussian, <https://gaussian.com/citation/>, (accessed 11 March 2025).
- 6 M. K. Blei, L. Waurick, F. Reissig, K. Kopka, T. Stumpf, B. Drobot, J. Kretzschmar and C. Mamat, Equilibrium Thermodynamics of Macropa Complexes with Selected Metal Isotopes of Radiopharmaceutical Interest, *Inorg. Chem.*, 2023, **62**, 20699–20709.
- 7 J.-D. Chai and M. Head-Gordon, Long-range corrected hybrid density functionals with damped atom–atom dispersion corrections, *Physical Chemistry Chemical Physics*, 2008, **10**, 6615–6620.
- 8 J.-D. Chai and M. Head-Gordon, Systematic optimization of long-range corrected hybrid density functionals, *J. Chem. Phys.*, 2008, **128**, 084106.

- 9 F. Weigend and R. Ahlrichs, Balanced basis sets of split valence, triple zeta valence and quadruple zeta valence quality for H to Rn: Design and assessment of accuracy, *Physical Chemistry Chemical Physics*, 2005, **7**, 3297–3305.
- 10 W. Küchle, M. Dolg, H. Stoll and H. Preuss, Ab initio pseudopotentials for Hg through Rn, *Mol. Phys.*, 1991, **74**, 1245–1263.
- 11 A. V Marenich, C. J. Cramer and D. G. Truhlar, Universal Solvation Model Based on Solute Electron Density and on a Continuum Model of the Solvent Defined by the Bulk Dielectric Constant and Atomic Surface Tensions, *J. Phys. Chem. B*, 2009, **113**, 6378–6396.
- 12 J. K. B. A. E. R. C. E. , J. A. B. C. M. and F. W. Glendening, NBO 6.0: Natural Bond Orbital Analysis program, 2013, preprint.
- 13 G. Luchini, J. V. Alegre-Requena, I. Funes-Ardoiz and R. S. Paton, GoodVibes: automated thermochemistry for heterogeneous computational chemistry data, *F1000Res.*, 2020, **9**, 291.
